# Supplementary material for: Epigenome‐Wide Tobacco‐Related Methylation Signature Identification and Their Multilevel Regulatory Network Inference for Lung Adenocarcinoma
Source: Hindawi journal article supplement (doi:10.1155/2020/2471915), 2020-01-01
Supplement: f1 [file 2471915.f1.pdf]

# Epigenome-wide tobacco-related methylation signature identification and their multi-level regulatory network inference for lung adenocarcinoma

## Supplementary Materials

Yan-Mei Dong<sup>1</sup>, Ming Li<sup>2</sup>, Qi-En He<sup>1</sup>, Yi-Fan Tong<sup>1</sup>, Ya-meng Wu, <sup>2</sup>Jun Hu<sup>4</sup>, Ning Zhang<sup>2\*</sup>, Kai Song<sup>1\*</sup>

1 School of Chemical Engineering and Technology, Tianjin University, 300072, Tianjin, China.

2 Department of Biomedical Engineering, Tianjin Key Lab of Biomedical Engineering Measurement, Tianjin University, 300072, Tianjin, China.

3 The Second Affiliated Hospital of Fujian Medical University, 362000, Quanzhou, Fujian, China.

4 Department of Hematology and Oncology, Karamay Central Hospital, 834000, Karamay, Xinjiang UygurAutonomous Region, China

\*Corresponding authors:

Kai Song, School of Chemical Engineering and Technology, Tianjin University, Tianjin, 300072, China.

Email: [ksong@tju.edu.cn](mailto:ksong@tju.edu.cn)

Ning Zhang, Department of Biomedical Engineering, Tianjin Key Lab of Biomedical Engineering Measurement, Tianjin University, 300072 Tianjin, China

Email: [zhni@tju.edu.cn](mailto:zhni@tju.edu.cn)

## Partial least squares (Qiu, et al., 2017)

Partial least squares (PLS) is an efficient statistical regression technique that is highly suited for the analysis of high-dimensional data, a powerfully proven method for analyzing genomic and proteomic data, especially problems of classification and dimension reduction in bioinformatics and genomics (Abdi and Williams, 2013; Nguyen and Rocke, 2002; Song, et al., 2012).

Suppose that the data  $X$  is an  $n \times p$  matrix of  $n$  samples and  $p$  genes (the raw data set should be scaled to zero mean and unit variance), and let  $Y$  denote the  $n \times q$  vector of response values, such as the indicator of classification of smokers and non-smokers. When  $n < p$ , the usual regression tools such as ordinary least squares (OLS), cannot be applied since the  $p \times p$  covariance matrix  $X^T X$  is singular. In contrast, PLS may be applied also to the cases, whose aims is to describe linear relationship between the predictor matrix  $X \in \mathbf{R}_{n \times p}$  and the response  $Y \in \mathbf{R}_{n \times q}$ ,

$$Y = XB + V \quad (1)$$

where  $B \in \mathbf{R}_{p \times q}$  is the regression coefficient matrix and  $V \in \mathbf{R}_{n \times q}$  is the residual matrix. PLS regression is based on the basic principal component decomposition:

$$Y = TQ^T + F \quad (2)$$

$$X = TP^T + E \quad (3)$$

where  $T \in \mathbf{R}_{n \times m}$  is the latent variables (LVs) matrix,  $P \in \mathbf{R}_{p \times m}$  and  $Q \in \mathbf{R}_{q \times m}$  are matrices of coefficients,  $E \in \mathbf{R}_{n \times p}$  and  $F \in \mathbf{R}_{n \times q}$  are matrices of random errors,  $m$  is the number of LVs.

From equation (1), (2), and (3), the  $T$  is the key. The objective criterion for constructing components in PLS is to sequentially maximize the covariance between the response variable and a linear combination of the predictors. That is, in PLS, the components are constructed to maximize the objective criterion based on the sample covariance between  $Y$  and  $XW$ , thus,

$$w_k = \arg \max_{w^T w = 1} \text{cov}_w^2(XW, Y) \quad (4)$$

Subject to the orthogonal constraint,

$$w_k^T X^T X W_i = 0 \quad \text{for all } 1 \leq k < i \quad (5)$$

Where  $W \in \mathbf{R}_{p \times m}$  is a matrix of weights.

To derive the  $T$ , PLS can all be seen as methods to construct a matrix of latent components  $T$  as a linear transformation of  $X$ ,

$$T = XW \quad (6)$$

If  $T$  is constructed,  $Q^T$  and is obtained as the least squares solution of Equation (2):

$$Q^T = (T^T T)^{-1} T^T Y \quad (7)$$

The matrix  $B$  regression coefficients matrix is constructed from Equation (1):

$$B = W(T^T T)^{-1} T^T Y \quad (8)$$

The number of LVs is the only parameter of PLS which need to be decided, with the increase of LVs, the information of original data preserved is increasing, until reaching the maximal value, which is the rank of  $X$ , all the information of original data is contained in LVs.

## Biweight midcorrelation coefficient algorithm (Yuan, et al., 2018)

Biweight midcorrelation is considered to be a good alternative to Pearson correlation coefficient since it is more robust to outliers.

In order to introduce the biweight midcorrelation coefficient (BIMC) of two numeric vectors  $x =$

$(x_1, \dots, x_n)$  and  $\mathbf{y} = (y_1, \dots, y_n)$ ,  $\mathbf{x}$  and  $\mathbf{y}$  can be two column vectors of DNA methylation matrix,  $u_i, v_i$  are defined with  $i=1, \dots, n$  as follows:

$$u_i = \frac{x_i - \text{med}(\mathbf{x})}{T \cdot \text{mad}(\mathbf{x})} \quad (9)$$

$$v_i = \frac{y_i - \text{med}(\mathbf{y})}{T \cdot \text{mad}(\mathbf{y})} \quad (10)$$

$$\text{mad}(\mathbf{x}) = \text{med}(|x_i - \text{med}(\mathbf{x})|) \quad (11)$$

where  $\text{med}(\mathbf{x})$  and  $\text{med}(\mathbf{y})$  are the median of vector  $\mathbf{x}$  and  $\mathbf{y}$  respectively.  $\text{mad}(\cdot)$  represents the median absolute deviation of numeric vector. Based on  $u_i$  and  $v_i$ . The weights  $w_i^{(x)}$  for  $x_i$  and  $w_i^{(y)}$  for  $y_i$  are defined as follows:

$$w_i^{(x)} = (1 - u_i^2)^2 \mathbf{I}(1 - |u_i|) \quad (12)$$

$$w_i^{(y)} = (1 - v_i^2)^2 \mathbf{I}(1 - |v_i|) \quad (13)$$

where  $\mathbf{I}$  is an indicator equation, for equation (13), the indicator equation  $\mathbf{I}(1 - |v_i|)$  is 1 if  $(1 - |v_i|) > 0$  and otherwise equals to 0. The same situation occurs for equation (12). For equation (10) and (13), as the difference between  $y_i$  and  $\text{med}(\mathbf{y})$  gets smaller and smaller,  $w_i^{(y)}$  gets closer to

1. If the difference between  $y_i$  and  $\text{med}(\mathbf{y})$  is larger than  $T \cdot \text{mad}(\mathbf{y})$ ,  $w_i^{(y)}$  equals to 0. The same situation occurs for equation (9) and equation (12).  $T$  is a pre-defined parameter. Let us discuss pre-defined parameter  $T$ . In practice, the bigger  $T$ , the smaller the number of values to be filtered out. For  $T$ , we chose the highest valid value to include all potentially interesting values. In addition, users can determine  $T$  based on the data characteristics and possible proportion of outliers. The weight values of all outliers are guaranteed to be 0. Based on  $w_i^{(x)}$  and  $w_i^{(y)}$ , we can define BIMC of vector  $\mathbf{x}$  and  $\mathbf{y}$  as follows:

$$\text{pre}(\mathbf{x}, \mathbf{y}) = \left( \frac{\sqrt{\sum_{i=1}^n [(x_i - \text{med}(\mathbf{x})) \cdot w_i^{(x)}]^2}}{\sqrt{\sum_{i=1}^n [(y_i - \text{med}(\mathbf{y})) \cdot w_i^{(y)}]^2}} \right)^{-1} \quad (14)$$

$$\text{BIMC}(\mathbf{x}, \mathbf{y}) = \left( \sum_{i=1}^n (x_i - \text{med}(\mathbf{x})) \cdot w_i^{(x)} \cdot (y_i - \text{med}(\mathbf{y})) \cdot w_i^{(y)} \right) \cdot \text{pre}(\mathbf{x}, \mathbf{y}) \quad (15)$$

where  $\text{BIMC}(\mathbf{x}, \mathbf{y})$  represents the BIMC of  $\mathbf{x}$  and  $\mathbf{y}$ . It should be noted that, the range of BIMC is from -1 to 1. If there is a strong positive linear relationship between DNA methylation vectors, the value of BIMC will be close to 1. If there is a strong negative linear relationship between methylation vectors, the value of BIMC will be close to -1. If there is no linear relationship or only a weak linear relationship between methylation vectors, the value of BIMC will be 0 or close to 0.

## Tobacco exposure Prediction Model assessment

SN (Sensitivity), SP (Specificity), ACC (Accuracy) are defined as follows:

$$SN = \frac{TP}{TP + FN} \quad (16)$$

$$SP = \frac{TN}{TN + FP} \quad (17)$$

$$ACC = \frac{TP + TN}{TP + TN + FP + FN} \quad (18)$$

where TP, FP, TN and FN denote true positive, false positive, true negative, and false negative, respectively. In our study, smoker samples and non-smoker samples were designated as the positive and negative samples, respectively. Correspondingly, sensitivity is the proportion of smoker samples correctly classified, specificity is the proportion of non-smoker samples correctly classified, and accuracy is the proportion of both types of samples correctly classified. In this study, current-smokers were used as positive sample, and never-smokers were used as negative sample.

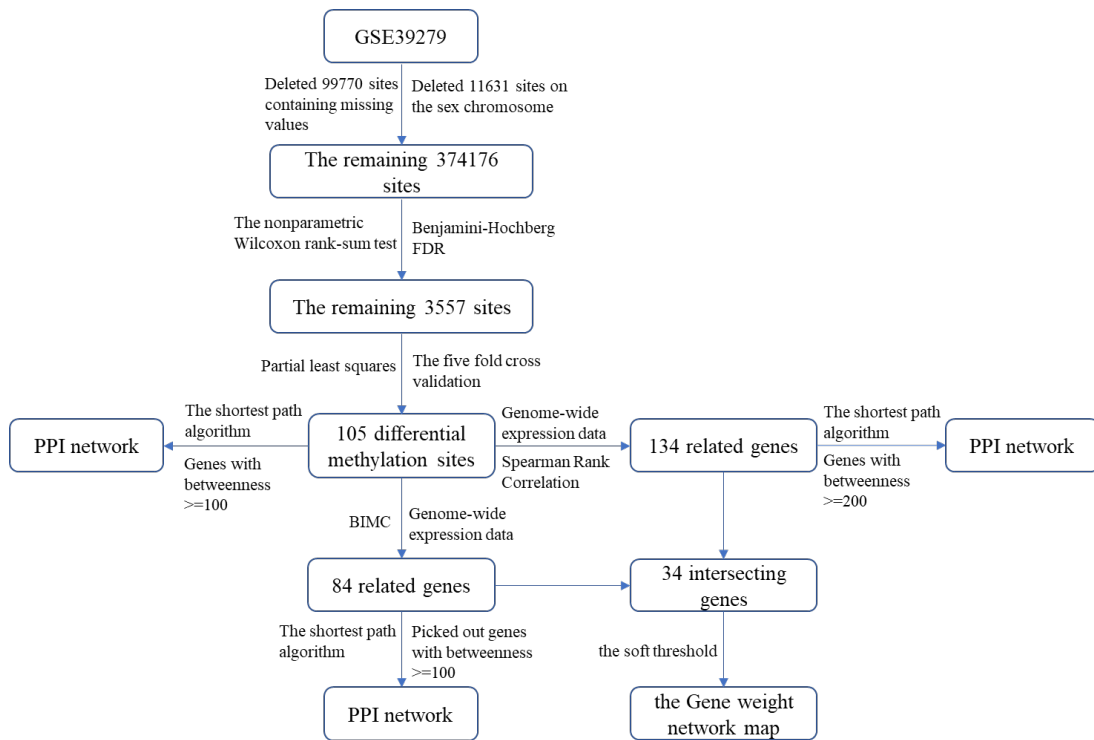

**Fig. S1** Flow chart for identification and classification of methylation biomarkers associated with smoking in lung adenocarcinoma

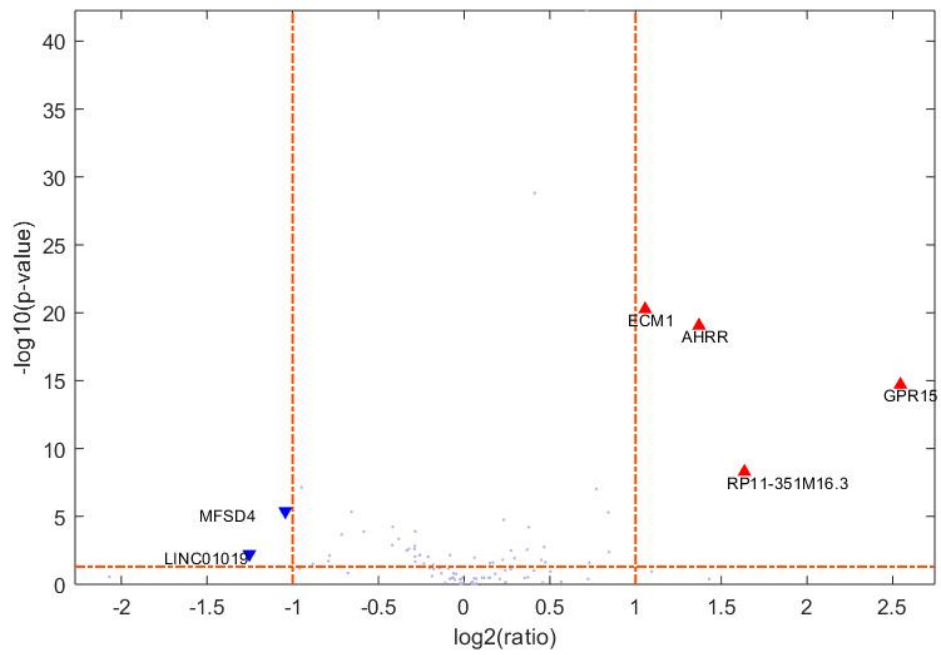

**Fig. S2** Volcano plot of 95 signature genes in never-smokers vs smokers

**Table S1.** List of 105 signature methylation probes p-value

|    | Probe      | Start     | End       | Gene_Symbol            | CGI_Coordinate                | Region  | Feature_Type | Median value<br>of smokers | Median value of<br>non-smokers | p-value* |
|----|------------|-----------|-----------|------------------------|-------------------------------|---------|--------------|----------------------------|--------------------------------|----------|
| 1  | cg00334821 | 74094664  | 74094665  | LIMK1                  | CGI:chr7:74083514-74084367    | Body    | .            | 0.21                       | 0.16                           | 4.22E-04 |
| 2  | cg00370022 | 74722851  | 74722852  | CYP1A1                 | CGI:chr15:74725845-74726995   | Body    | N_Shelf      | 0.62                       | 0.69                           | 9.02E-06 |
| 3  | cg00688979 | 31145240  | 31145241  | CCHCR1                 | CGI:chr6:31158308-31158784    | Body    | .            | 0.82                       | 0.78                           | 1.80E-05 |
| 4  | cg00702638 | 44761801  | 44761802  | KIAA1143;KIF15         | CGI:chr3:44761360-44762126    | TSS200  | Island       | 0.04                       | 0.06                           | 1.70E-05 |
| 5  | cg00976097 | 421618    | 421619    | AHRR                   | CGI:chr5:421109-421636        | Body    | Island       | 0.93                       | 0.90                           | 1.31E-04 |
| 6  | cg00993400 | 248859480 | 248859481 | AL672294.1;ZNF692      | CGI:chr1:248858212-248859220  | TSS1500 | S_Shore      | 0.14                       | 0.17                           | 2.60E-05 |
| 7  | cg01049916 | 121517540 | 121517541 | FGFR2                  | CGI:chr10:121597102-121598771 | Body    | .            | 0.80                       | 0.83                           | 3.82E-04 |
| 8  | cg01637537 | 40021281  | 40021282  | FAM83F                 | CGI:chr22:40021349-40021866   | Body    | N_Shore      | 0.64                       | 0.70                           | 1.85E-04 |
| 9  | cg01971034 | 50330970  | 50330971  | .                      | CGI:chr1:50332995-50333864    | .       | N_Shelf      | 0.68                       | 0.74                           | 3.14E-04 |
| 10 | cg02050426 | 61554225  | 61554226  | CDH20                  | CGI:chr18:61554218-61554753   | Body    | Island       | 0.74                       | 0.79                           | 1.29E-04 |
| 11 | cg02387679 | 76404040  | 76404041  | IQGAP2                 | CGI:chr5:76402934-76404335    | Body    | Island       | 0.19                       | 0.14                           | 2.81E-05 |
| 12 | cg02498206 | 113268168 | 113268169 | BOC                    | CGI:chr3:113211590-113212659  | Body    | .            | 0.80                       | 0.84                           | 9.35E-05 |
| 13 | cg02826525 | 38959744  | 38959745  | ARHGEF33;RP11-173C1.1  | CGI:chr2:38959636-38960827    | Body    | Island       | 0.83                       | 0.86                           | 4.34E-05 |
| 14 | cg02988118 | 42097957  | 42097958  | .                      | CGI:chr2:42101349-42101687    | .       | N_Shelf      | 0.86                       | 0.84                           | 8.70E-05 |
| 15 | cg03078488 | 23467029  | 23467030  | IGF2BP3                | CGI:chr7:23468565-23470093    | Body    | N_Shore      | 0.80                       | 0.83                           | 2.84E-04 |
| 16 | cg03277049 | 156816287 | 156816288 | LINC00886              | CGI:chr3:156816050-156817342  | .       | Island       | 0.24                       | 0.34                           | 3.46E-05 |
| 17 | cg03642695 | 15308641  | 15308642  | TEKT3                  | CGI:chr17:15341388-15341809   | Body    | .            | 0.81                       | 0.86                           | 1.08E-04 |
| 18 | cg03789372 | 27268239  | 27268240  | .                      | CGI:chr8:27287614-27288084    | .       | .            | 0.61                       | 0.67                           | 1.79E-04 |
| 19 | cg03806812 | 85953713  | 85953714  | .                      | CGI:chr2:85888467-85889204    | .       | .            | 0.52                       | 0.45                           | 2.44E-04 |
| 20 | cg03945895 | 13784857  | 13784858  | PRDM2                  | CGI:chr1:13748772-13749963    | Body    | .            | 0.88                       | 0.86                           | 3.60E-05 |
| 21 | cg03985801 | 202213475 | 202213476 | LGR6                   | CGI:chr1:202214065-202214535  | TSS1500 | N_Shore      | 0.47                       | 0.54                           | 4.85E-05 |
| 22 | cg04267214 | 38804378  | 38804379  | .                      | CGI:chr1:38804057-38804579    | .       | Island       | 0.17                       | 0.13                           | 3.95E-04 |
| 23 | cg04616529 | 11088129  | 11088130  | CLEC16A                | CGI:chr16:11174035-11174354   | Body    | .            | 0.83                       | 0.79                           | 1.92E-04 |
| 24 | cg04865290 | 52893532  | 52893533  | TMEM110;TMEM110-MUSTN1 | CGI:chr3:52897210-52897824    | Body    | N_Shelf      | 0.71                       | 0.63                           | 4.10E-05 |
| 25 | cg05033369 | 161706679 | 161706680 | FCRLA                  | CGI:chr1:161725847-161727508  | TSS1500 | .            | 0.29                       | 0.41                           | 9.98E-06 |
| 26 | cg05559381 | 123874771 | 123874772 | .                      | CGI:chr5:123636064-123636314  | .       | .            | 0.73                       | 0.66                           | 1.99E-04 |
| 27 | cg05575921 | 373263    | 373264    | AHRR                   | CGI:chr5:373727-374311        | Body    | N_Shore      | 0.61                       | 0.68                           | 4.43E-04 |
| 28 | cg05752786 | 202710627 | 202710628 | SYT2                   | CGI:chr1:202709795-202710641  | TSS1500 | Island       | 0.15                       | 0.08                           | 1.85E-04 |
| 29 | cg05787209 | 31011200  | 31011201  | STX1B                  | CGI:chr16:31010457-31011052   | TSS1500 | S_Shore      | 0.58                       | 0.64                           | 3.70E-04 |
| 30 | cg05951221 | 232419692 | 232419693 | ECEL1P1                | CGI:chr2:232418687-232421249  | .       | Island       | 0.33                       | 0.40                           | 7.95E-05 |
| 31 | cg06010163 | 156564851 | 156564852 | .                      | CGI:chr6:156631022-156631312  | .       | .            | 0.36                       | 0.31                           | 1.06E-04 |
| 32 | cg06227763 | 10447087  | 10447088  | .                      | CGI:chr18:10454085-10455271   | .       | .            | 0.74                       | 0.79                           | 3.52E-04 |
| 33 | cg06540950 | 124574637 | 124574638 | .                      | CGI:chr5:124651705-124652055  | .       | .            | 0.80                       | 0.70                           | 1.16E-04 |
| 34 | cg06637330 | 3587737   | 3587738   | .                      | CGI:chr5:3590530-3591886      | .       | N_Shelf      | 0.34                       | 0.46                           | 1.06E-04 |

|    |            |           |           |                              |                               |         |         |      |      |          |
|----|------------|-----------|-----------|------------------------------|-------------------------------|---------|---------|------|------|----------|
| 35 | cg07160783 | 64827508  | 64827509  | .                            | CGI:chr16:64950778-64951005   | .       | .       | 0.69 | 0.78 | 3.19E-04 |
| 36 | cg07325233 | 33266357  | 33266358  | AP000295.9;IL10RB;IL10RB-AS1 | CGI:chr21:33266210-33266770   | TSS200  | Island  | 0.04 | 0.04 | 2.36E-04 |
| 37 | cg07709148 | 29529721  | 29529722  | RP11-486M23.1                | CGI:chr8:29352966-29353284    | .       | .       | 0.14 | 0.10 | 5.22E-05 |
| 38 | cg07813142 | 170716713 | 170716714 | SP5                          | CGI:chr2:170713367-170717394  | Body    | Island  | 0.37 | 0.56 | 1.24E-04 |
| 39 | cg08008475 | 27403642  | 27403643  | RNY1P1                       | CGI:chr13:27424449-27425041   | .       | .       | 0.76 | 0.69 | 8.86E-05 |
| 40 | cg08374798 | 62815701  | 62815702  | COL9A3                       | CGI:chr20:62816333-62817666   | TSS1500 | N_Shore | 0.55 | 0.47 | 1.00E-04 |
| 41 | cg08733957 | 23798808  | 23798809  | GALE                         | CGI:chr1:23800300-23801059    | Body    | N_Shore | 0.77 | 0.70 | 2.24E-04 |
| 42 | cg08894131 | 147758953 | 147758954 | GJA5                         | CGI:chr1:147669720-147670796  | Body    | .       | 0.73 | 0.80 | 4.73E-04 |
| 43 | cg09194449 | 157690222 | 157690223 | PTPRN2                       | CGI:chr7:157688558-157694027  | Body    | Island  | 0.30 | 0.23 | 7.00E-05 |
| 44 | cg09278187 | 42178361  | 42178362  | FOXJ3                        | CGI:chr1:42145814-42146020    | 3'UTR   | .       | 0.71 | 0.60 | 1.59E-04 |
| 45 | cg09370982 | 2497558   | 2497559   | RP11-20123.1;TBC1D24         | CGI:chr16:2496263-2497038     | Body    | S_Shore | 0.71 | 0.62 | 1.67E-04 |
| 46 | cg09799983 | 38074613  | 38074614  | CYP1B1;CYP1B1-AS1            | CGI:chr2:38074133-38077376    | Body    | Island  | 0.28 | 0.54 | 6.04E-08 |
| 47 | cg10076730 | 110438086 | 110438087 | COL4A2                       | CGI:chr13:110438290-110438513 | Body    | N_Shore | 0.75 | 0.78 | 4.76E-05 |
| 48 | cg10354195 | 132375285 | 132375286 | LRRC27                       | CGI:chr10:132388102-132388909 | 3'UTR   | .       | 0.83 | 0.78 | 3.82E-04 |
| 49 | cg10385390 | 7962445   | 7962446   | PARK7                        | CGI:chr1:7961241-7962166      | 5'UTR   | S_Shore | 0.29 | 0.34 | 2.79E-04 |
| 50 | cg10413224 | 34079146  | 34079147  | BMPER                        | CGI:chr7:34078851-34079147    | Body    | Island  | 0.68 | 0.74 | 1.24E-05 |
| 51 | cg10650290 | 158386935 | 158386936 | PTPRN2                       | CGI:chr7:158405853-158406215  | Body    | .       | 0.61 | 0.70 | 2.56E-04 |
| 52 | cg11545521 | 47997915  | 47997916  | PTPRJ                        | CGI:chr11:47980052-47981618   | Body    | .       | 0.68 | 0.57 | 4.53E-07 |
| 53 | cg11751707 | 38075444  | 38075445  | CYP1B1;CYP1B1-AS1            | CGI:chr2:38074133-38077376    | 5'UTR   | Island  | 0.12 | 0.26 | 1.20E-08 |
| 54 | cg11954332 | 170670148 | 170670149 | PRRX1                        | CGI:chr1:170664161-170665037  | Body    | .       | 0.47 | 0.54 | 3.35E-04 |
| 55 | cg12020590 | 134656427 | 134656428 | .                            | CGI:chr11:134664348-134664563 | .       | .       | 0.65 | 0.76 | 3.53E-05 |
| 56 | cg12387247 | 7702088   | 7702089   | FCER2                        | CGI:chr19:7680604-7682828     | 1stExon | .       | 0.52 | 0.60 | 8.55E-05 |
| 57 | cg13563863 | 3506441   | 3506442   | FZR1                         | CGI:chr19:3505822-3506772     | 5'UTR   | Island  | 0.08 | 0.09 | 4.36E-04 |
| 58 | cg13654445 | 85021468  | 85021469  | NTRK2                        | CGI:chr9:84668263-84670789    | 3'UTR   | .       | 0.84 | 0.87 | 8.86E-05 |
| 59 | cg13990746 | 173669905 | 173669906 | ANKRD45                      | CGI:chr1:173669523-173669906  | TSS200  | Island  | 0.29 | 0.17 | 2.52E-04 |
| 60 | cg14270346 | 38026079  | 38026080  | RP11-613M10.9;SHB            | CGI:chr9:38067686-38069631    | Body    | .       | 0.54 | 0.44 | 2.88E-04 |
| 61 | cg14320852 | 87265792  | 87265793  | .                            | CGI:chr9:87148421-87148852    | .       | .       | 0.74 | 0.80 | 1.51E-04 |
| 62 | cg14373988 | 2413894   | 2413895   | PEX10                        | CGI:chr1:2414452-2414717      | TSS1500 | N_Shore | 0.67 | 0.79 | 1.43E-04 |
| 63 | cg14419740 | 157690643 | 157690644 | PTPRN2                       | CGI:chr7:157688558-157694027  | Body    | Island  | 0.40 | 0.23 | 4.15E-04 |
| 64 | cg15233380 | 26046474  | 26046475  | SHISA2                       | CGI:chr13:26050587-26052127   | 3'UTR   | .       | 0.75 | 0.80 | 2.56E-04 |
| 65 | cg15513657 | 100778269 | 100778270 | MEG3                         | CGI:chr14:100734280-100734592 | .       | .       | 0.79 | 0.83 | 3.82E-04 |
| 66 | cg15585555 | 206559387 | 206559388 | RASSF5                       | CGI:chr1:206557069-206557580  | Body    | S_Shore | 0.49 | 0.37 | 3.46E-05 |
| 67 | cg15680620 | 173669991 | 173669992 | ANKRD45                      | CGI:chr1:173669523-173669906  | TSS200  | S_Shore | 0.43 | 0.33 | 2.61E-04 |
| 68 | cg15922705 | 70281453  | 70281454  | COL9A1                       | CGI:chr6:70282337-70283209    | Body    | N_Shore | 0.74 | 0.82 | 5.22E-05 |
| 69 | cg16315376 | 202710634 | 202710635 | SYT2                         | CGI:chr1:202709795-202710641  | TSS1500 | Island  | 0.25 | 0.17 | 1.63E-04 |
| 70 | cg16322479 | 444113    | 444114    | EXOC3;EXOC3-AS1              | CGI:chr5:442705-443489        | 5'UTR   | S_Shore | 0.62 | 0.72 | 2.44E-04 |

|     |            |           |           |                     |                               |         |         |      |      |          |
|-----|------------|-----------|-----------|---------------------|-------------------------------|---------|---------|------|------|----------|
| 71  | cg16377959 | 3511267   | 3511268   | LINC01019           | CGI:chr5:3535516-3536241      | .       | .       | 0.82 | 0.87 | 9.87E-05 |
| 72  | cg16840978 | 37896037  | 37896038  | RAB11FIP1           | CGI:chr8:37898936-37899821    | Body    | N_Shelf | 0.74 | 0.65 | 3.44E-06 |
| 73  | cg16884847 | 45894349  | 45894350  | PRKCE               | CGI:chr2:45650039-45652546    | Body    | .       | 0.73 | 0.58 | 1.73E-04 |
| 74  | cg17211612 | 123846100 | 123846101 | DNAH10              | CGI:chr12:123787581-123788038 | Body    | .       | 0.80 | 0.92 | 9.87E-05 |
| 75  | cg17373442 | 143121149 | 143121150 | CHST2               | CGI:chr3:143119043-143121996  | Body    | Island  | 0.33 | 0.12 | 3.19E-04 |
| 76  | cg17676618 | 78803664  | 78803665  | .                   | CGI:chr10:78973556-78974256   | .       | .       | 0.55 | 0.64 | 4.29E-04 |
| 77  | cg18001059 | 42932481  | 42932482  | MRPL32;PSMA2        | CGI:chr7:42932035-42932700    | 1stExon | Island  | 0.05 | 0.06 | 6.88E-05 |
| 78  | cg18713316 | 154760384 | 154760385 | KCNN3               | CGI:chr1:154760346-154760960  | Body    | Island  | 0.38 | 0.31 | 3.41E-04 |
| 79  | cg18883807 | 96027662  | 96027663  | .                   | CGI:chr14:96038974-96040065   | .       | .       | 0.17 | 0.22 | 4.15E-04 |
| 80  | cg18919659 | 42947078  | 42947079  | PACSLN2             | CGI:chr22:43014415-43015504   | TSS200  | .       | 0.62 | 0.54 | 1.79E-04 |
| 81  | cg19341901 | 149883790 | 149883791 | .                   | CGI:chr7:149873277-149874300  | .       | .       | 0.65 | 0.54 | 2.93E-04 |
| 82  | cg19859270 | 98532450  | 98532451  | CPOX;GPR15          | CGI:chr3:98522565-98523091    | 1stExon | .       | 0.79 | 0.83 | 1.20E-06 |
| 83  | cg20439473 | 57983709  | 57983710  | VEZF1               | CGI:chr17:57987469-57988690   | Body    | N_Shelf | 0.83 | 0.76 | 3.95E-04 |
| 84  | cg20459495 | 158923446 | 158923447 | .                   | CGI:chr2:158968342-158969889  | .       | .       | 0.50 | 0.42 | 1.77E-05 |
| 85  | cg20538211 | 57161121  | 57161122  | IGFBP7-AS1          | CGI:chr4:57163675-57164360    | .       | N_Shelf | 0.51 | 0.58 | 1.51E-04 |
| 86  | cg20546279 | 152894924 | 152894925 | .                   | CGI:chr7:152894373-152894621  | .       | S_Shore | 0.59 | 0.66 | 3.52E-04 |
| 87  | cg20628376 | 28469158  | 28469159  | RP11-351M16.3       | CGI:chr10:28532260-28534163   | .       | .       | 0.43 | 0.51 | 4.50E-05 |
| 88  | cg21012061 | 205599429 | 205599430 | ELK4;MFSD4          | CGI:chr1:205591961-205592345  | Body    | .       | 0.64 | 0.51 | 2.07E-05 |
| 89  | cg21083936 | 2273860   | 2273861   | .                   | CGI:chr11:2268874-2271702     | .       | S_Shelf | 0.68 | 0.58 | 3.76E-04 |
| 90  | cg21500300 | 24949587  | 24949588  | BCAT1;RP11-662113.2 | CGI:chr12:24948673-24949139   | TSS1500 | S_Shore | 0.64 | 0.72 | 1.79E-04 |
| 91  | cg21885107 | 73245581  | 73245582  | PAPLN;RP4-647C14.2  | CGI:chr14:73245580-73246203   | Body    | Island  | 0.45 | 0.51 | 2.40E-04 |
| 92  | cg23369748 | 148384526 | 148384527 | SASH1               | CGI:chr6:148342289-148343079  | Body    | .       | 0.77 | 0.80 | 3.82E-04 |
| 93  | cg23501962 | 35418705  | 35418706  | RP4-683L5.1;SLC1A2  | CGI:chr11:35418874-35420335   | Body    | N_Shore | 0.21 | 0.17 | 4.15E-04 |
| 94  | cg23854567 | 120257090 | 120257091 | PXN                 | CGI:chr12:120265173-120265738 | Body    | .       | 0.59 | 0.47 | 4.50E-05 |
| 95  | cg24203542 | 19440737  | 19440738  | NAV2                | CGI:chr11:19346350-19346687   | Body    | .       | 0.77 | 0.67 | 2.61E-04 |
| 96  | cg24279017 | 11724806  | 11724807  | ETV6                | CGI:chr12:11648919-11649619   | Body    | .       | 0.59 | 0.50 | 8.86E-05 |
| 97  | cg24772753 | 170716909 | 170716910 | SP5                 | CGI:chr2:170713367-170717394  | Body    | Island  | 0.46 | 0.57 | 1.20E-04 |
| 98  | cg25192619 | 37499628  | 37499629  | CCDC167             | CGI:chr6:37499619-37500024    | Body    | Island  | 0.16 | 0.18 | 3.82E-04 |
| 99  | cg26005485 | 138496253 | 138496254 | FAM135B             | CGI:chr8:138496552-138497531  | 5'UTR   | N_Shore | 0.50 | 0.56 | 1.89E-04 |
| 100 | cg26029292 | 144830196 | 144830197 | ZNF7                | CGI:chr8:144826448-144827907  | Body    | S_Shelf | 0.70 | 0.77 | 3.70E-04 |
| 101 | cg26076054 | 421202    | 421203    | AHRR                | CGI:chr5:421109-421636        | Body    | Island  | 0.88 | 0.80 | 2.48E-04 |
| 102 | cg26582784 | 92836028  | 92836029  | AC002454.1;CDK6     | CGI:chr7:92832887-92837073    | 5'UTR   | Island  | 0.09 | 0.08 | 2.20E-04 |
| 103 | cg26799398 | 150507033 | 150507034 | ECM1;TARS2          | CGI:chr1:150515560-150515940  | TSS1500 | .       | 0.83 | 0.77 | 2.88E-04 |
| 104 | cg26972614 | 71999839  | 71999840  | IL18BP              | CGI:chr11:72080339-72080914   | 5'UTR   | .       | 0.48 | 0.40 | 9.02E-06 |
| 105 | cg27052537 | 134638283 | 134638284 | .                   | CGI:chr7:134458363-134459311  | .       | .       | 0.61 | 0.48 | 1.08E-04 |

\* Wilcoxon rank-sum test



**Table S2.** Significantly enriched pathways of genes corresponding to 105 differential probes

| #Term                            | ID       | P-Value  | Corrected P-Value | Input                    |
|----------------------------------|----------|----------|-------------------|--------------------------|
| ECM-receptor interaction         | hsa04512 | 0.000761 | 0.012246044       | 1284 1299 1297           |
| PI3K-Akt signaling pathway       | hsa04151 | 0.000811 | 0.012741464       | 2263 1299 1021 1297 1284 |
| Focal adhesion                   | hsa04510 | 0.000944 | 0.014020672       | 5829 1284 1299 1297      |
| Protein digestion and absorption | hsa04974 | 0.000988 | 0.01435258        | 1284 1299 1297           |
| Regulation of actin cytoskeleton | hsa04810 | 0.001162 | 0.015962134       | 5829 2263 10788 3984     |
| Tryptophan metabolism            | hsa00380 | 0.003497 | 0.031923526       | 1545 1543                |
| Ovarian steroidogenesis          | hsa04913 | 0.005314 | 0.040827449       | 1545 1543                |
| Non-small cell lung cancer       | hsa05223 | 0.006571 | 0.046783375       | 83593 1021               |
| Steroid hormone biosynthesis     | hsa00140 | 0.007017 | 0.048651705       | 1545 1543                |

**Table S3.** GO enrichment analysis of genes corresponding to 105 differential probes

| #Term | ID                               | P-Value  | Corrected P-Value | Gene ID                                                                                                                                                                                                                                                                                                                                                                            |
|-------|----------------------------------|----------|-------------------|------------------------------------------------------------------------------------------------------------------------------------------------------------------------------------------------------------------------------------------------------------------------------------------------------------------------------------------------------------------------------------|
| 1     | single-organism process          | 3.15E-16 | 9.18E-13          | 64518 51059 5396 57465 127833 83593 10068 2838 23328 7799 11336 6506 196385 1893 91653 80223 80222 1543 7716 5829 51343 89797 5192 1371 387914 1299 7553 2263 100526772 1297 5683 586 1545 2582 2120 3588 10643 2702 84824 59352 100271715 11315 10788 4915 3782 1284 1021 112755 6461 375346 5581 11252 64983 2208 5795 389058 56992 2005 3984 9435 168667 54535 5799             |
| 2     | cellular process                 | 1.56E-14 | 2.28E-11          | 64518 51059 5396 57465 127833 83593 10068 2838 23328 7799 11336 6506 5799 196385 1893 91653 80223 80222 1543 7716 5829 51343 5192 1371 1299 7553 2263 100526772 1297 5683 89932 586 1545 2120 3588 10643 2702 23274 84824 59352 100271715 11315 10788 57491 4915 3782 1284 1021 112755 6461 375346 5581 11252 64983 2208 5795 389058 56992 55657 2005 3984 9435 168667 54535 22887 |
| 3     | single-organism cellular process | 2.18E-12 | 2.12E-09          | 64518 51059 5396 57465 127833 83593 10068 2838 23328 11336 6506 196385 1893 91653 80223 80222 1543 7716 5829 51343 5192 1371 1299 2263 100526772 1297 5683 586 1545 2120 3588 2702 84824 59352 100271715 11315 10788 4915 3782 1284 1021 112755 6461 375346 5581 11252 64983 2208 5795 56992 2005 3984 168667 54535 5799                                                           |
| 4     | binding                          | 5.35E-12 | 3.89E-09          | 64518 4915 5396 57465 127833 83593 10068 23328 7799 6506 196385 1893 91653 80223 80222 1543 7716 5829 51343 89797 5192 1371                                                                                                                                                                                                                                                        |

|    |                                          |            |          |          |                                                                                                                                                                                                                                                                                                                                                                   |
|----|------------------------------------------|------------|----------|----------|-------------------------------------------------------------------------------------------------------------------------------------------------------------------------------------------------------------------------------------------------------------------------------------------------------------------------------------------------------------------|
|    |                                          |            |          |          | 1 7553 2263 1297 5683 89932 57456 1545 2582 339416 2120 3588 10643 2702 57491 59352 11336 11315 10788 586 3782 1284 1021 112755 6461 375346 5581 11252 64983 28316 2208 5795 389058 56992 55657 2005 3984 9435 54535 22887                                                                                                                                        |
| 5  | cell part                                | GO:0044464 | 2.24E-11 | 1.18E-08 | 64518 4915 5396 57465 127833 83593 56992 11336 6506 7799 5799 196385 1893 91653 80223 80222 1543 7716 5829 51343 89797 5192 1371 387914 1299 7553 2263 100526772 1297 5683 586 1545 2582 2120 3588 10643 2702 23274 84824 59352 2838 11315 10788 57491 3782 1284 1021 112755 6461 375346 5581 11252 64983 28316 2208 5795 389058 55657 2005 3984 9435 54535 22887 |
| 6  | cell                                     | GO:0005623 | 2.43E-11 | 1.18E-08 | 64518 4915 5396 57465 127833 83593 56992 11336 6506 7799 5799 196385 1893 91653 80223 80222 1543 7716 5829 51343 89797 5192 1371 387914 1299 7553 2263 100526772 1297 5683 586 1545 2582 2120 3588 10643 2702 23274 84824 59352 2838 11315 10788 57491 3782 1284 1021 112755 6461 375346 5581 11252 64983 28316 2208 5795 389058 55657 2005 3984 9435 54535 22887 |
| 7  | developmental process                    | GO:0032502 | 1.59E-10 | 6.59E-08 | 64518 5396 57465 127833 23328 7799 1893 91653 1545 1543 7716 51343 89797 387914 1299 7553 2263 100526772 1297 5683 2120 10643 2702 84824 1284 1021 6461 4915 11252 6506 389058 2005 3984 9435 168667 54535                                                                                                                                                        |
| 8  | single-organism<br>developmental process | GO:0044767 | 4.67E-10 | 1.62E-07 | 64518 5396 57465 127833 23328 7799 1893 91653 1545 1543 7716 51343 89797 387914 1299 7553 2263 100526772 1297 5683 2120 2702 84824 1284 1021 6461 4915 11252 6506 389058 2005 3984 9435 168667 54535                                                                                                                                                              |
| 9  | anatomical structure<br>development      | GO:0048856 | 5.01E-10 | 1.62E-07 | 64518 5396 57465 127833 23328 7799 1893 91653 1545 1543 7716 51343 89797 387914 1299 7553 2263 100526772 1297 5683 2120 10643 2702 389058 1284 1021 6461 4915 11252 6506 3984 9435 168667 54535                                                                                                                                                                   |
| 10 | biological regulation                    | GO:0065007 | 8.60E-10 | 2.50E-07 | 64518 4915 5396 57465 127833 83593 10068 100271715 23328 7799 5799 1893 91653 80223 57491 1543 7716 5829 51343 89797 89932 7553 2263 5683 1545 2120 3588 10643 2702 389058 59352 2838 11315 10788 3782 1284 1021 112755 6461 375346 5581 11252 6506 2208 5795 55657 2005 3984 168667 22887                                                                        |
| 11 | single-multicellular organism<br>process | GO:0044707 | 1.32E-09 | 3.48E-07 | 4915 5396 57465 127833 23328 7799 1893 91653 80223 1545 1543 7716 51343 89797 387914 1299 7553 2263 100526772 1297 5683 2120 10643 2702 389058 11315 1284 1021 6461 5581 6506 3984 9435 168667 54535                                                                                                                                                              |
| 12 | regulation of biological<br>process      | GO:0050789 | 1.70E-09 | 4.12E-07 | 64518 4915 5396 127833 83593 10068 100271715 23328 7799 5799 1893 91653 80223 57491 1543 7716 5829 51343 89932 7553 2263 5683 1545 2120 3588 10643 2702 389058 59352 2838 11315 10788 3782 1284 1021 112755 6461 375346 5581 11252 6506 2208 5795 55657 2005 3984 168667 22887                                                                                    |
| 13 | membrane-bounded<br>organelle            | GO:0043227 | 2.20E-09 | 4.92E-07 | 64518 4915 5396 127833 83593 10068 7799 5799 1893 80223 80222 1543 7716 5829 51343 89797 5192 1371 387914 1299 7553 2263 100526772 1297 5683 1545 2582 2120 3588 10643 112755 23274 389058 59352 11336 11315 10788 1284 1021 375346 5581 11252 64983 2208 5795 55657 2005 3984 9435 54535 22887                                                                   |
| 14 | organelle                                | GO:0043226 | 2.48E-09 | 5.17E-07 | 64518 4915 5396 127833 83593 10068 7799 5799 196385 1893 80223 80222 1543 7716 5829 51343 89797 5192 1371 387914 1299 7553                                                                                                                                                                                                                                        |

|    |                                    |            |          |          |                                                                                                                                                                                                                                                                                                                    |
|----|------------------------------------|------------|----------|----------|--------------------------------------------------------------------------------------------------------------------------------------------------------------------------------------------------------------------------------------------------------------------------------------------------------------------|
|    |                                    |            |          |          | 2263 100526772 1297 5683 1545 2582 2120 3588 10643 112755 23274 389058 59352 11336 11315 10788 1284 1021 375346 5581 11252 64983 2208 5795 56992 55657 2005 3984 9435 54535 22887                                                                                                                                  |
| 15 | multicellular organism development | GO:0007275 | 2.96E-09 | 5.74E-07 | 5396 57465 127833 23328 7799 1893 91653 1545 1543 7716 51343 89797 387914 1299 7553 2263 100526772 1297 5683 2120 2702 389058 1284 1021 6461 4915 6506 3984 9435 168667 54535                                                                                                                                      |
| 16 | multicellular organismal process   | GO:0032501 | 5.04E-09 | 9.18E-07 | 4915 5396 57465 127833 23328 7799 1893 91653 80223 1545 1543 7716 5829 51343 89797 387914 1299 7553 2263 100526772 1297 5683 2120 10643 2702 389058 11315 1284 1021 6461 5581 6506 5795 3984 9435 168667 54535                                                                                                     |
| 17 | intracellular part                 | GO:0044424 | 6.15E-09 | 1.05E-06 | 64518 4915 5396 57465 127833 83593 56992 7799 5799 196385 1893 80223 80222 1543 7716 5829 51343 89797 5192 1371 387914 1299 7553 2263 100526772 1297 5683 586 1545 2582 2120 10643 112755 23274 84824 59352 11336 11315 10788 57491 1284 1021 6461 375346 5581 11252 64983 389058 55657 2005 3984 9435 54535 22887 |
| 18 | blood vessel morphogenesis         | GO:0048514 | 7.49E-09 | 1.21E-06 | 1284 1545 5396 7716 6461 4915 23328 2263 2702 168667 1893                                                                                                                                                                                                                                                          |
| 19 | protein binding                    | GO:0005515 | 9.20E-09 | 1.39E-06 | 64518 5396 57465 127833 83593 10068 23328 1893 91653 80223 57491 1543 5581 5829 51343 89797 5192 1371 2263 56992 5683 57456 2582 339416 2120 3588 10643 2702 59352 11336 11315 10788 586 3782 1284 1021 112755 6461 375346 4915 11252 6506 2208 5795 2005 3984 54535                                               |
| 20 | intracellular organelle part       | GO:0044446 | 9.58E-09 | 1.39E-06 | 64518 5396 127833 83593 56992 196385 1893 80223 80222 1543 7716 5829 51343 89797 5192 1371 387914 1299 2263 1297 5683 2120 112755 23274 1545 59352 11336 11315 10788 1284 1021 375346 4915 11252 64983 2005 3984 9435 54535 5799                                                                                   |
| 21 | intracellular                      | GO:0005622 | 1.68E-08 | 2.33E-06 | 64518 4915 5396 57465 127833 83593 56992 7799 5799 196385 1893 80223 80222 1543 7716 5829 51343 89797 5192 1371 387914 1299 7553 2263 100526772 1297 5683 586 1545 2582 2120 10643 112755 23274 84824 59352 11336 11315 10788 57491 1284 1021 6461 375346 5581 11252 64983 389058 55657 2005 3984 9435 54535 22887 |
| 22 | organelle part                     | GO:0044422 | 1.84E-08 | 2.43E-06 | 64518 5396 127833 83593 56992 196385 1893 80223 80222 1543 7716 5829 51343 89797 5192 1371 387914 1299 2263 1297 5683 2120 112755 23274 1545 59352 11336 11315 10788 1284 1021 375346 4915 11252 64983 2005 3984 9435 54535 5799                                                                                   |
| 23 | blood vessel development           | GO:0001568 | 3.80E-08 | 4.81E-06 | 1284 1545 5396 7716 6461 4915 23328 2263 2702 168667 1893                                                                                                                                                                                                                                                          |
| 24 | vasculature development            | GO:0001944 | 5.34E-08 | 6.37E-06 | 1284 1545 5396 7716 6461 4915 23328 2263 2702 168667 1893                                                                                                                                                                                                                                                          |
| 25 | regulation of cellular process     | GO:0050794 | 5.47E-08 | 6.37E-06 | 4915 5396 127833 83593 10068 100271715 23328 7799 1893 91653 80223 57491 1543 7716 5829 51343 89932 7553 2263 5683 1545 3588 10643 2702 389058 59352 2838 11315 10788 3782 2120 1021 112755 6461 375346 5581 11252 2208 5795 55657 2005 3984 168667 22887                                                          |
| 26 | intracellular organelle            | GO:0043229 | 6.76E-08 | 7.49E-06 | 64518 4915 5396 127833 83593 56992 7799 5799 196385 1893 80223 80222 1543 7716 5829 51343 89797 5192 1371 387914 1299 7553                                                                                                                                                                                         |

|    |                                           |            |          |          |                                                                                                                                                                                                                                                                 |
|----|-------------------------------------------|------------|----------|----------|-----------------------------------------------------------------------------------------------------------------------------------------------------------------------------------------------------------------------------------------------------------------|
|    |                                           |            |          |          | 2263 100526772 1297 5683 1545 2120 10643 112755 23274 389058 59352 11336 11315 10788 1284 1021 375346 5581 11252 64983 55657 2005 3984 9435 54535 22887                                                                                                         |
| 27 | cytoplasm                                 | GO:0005737 | 6.95E-08 | 7.49E-06 | 64518 57465 127833 83593 56992 196385 1893 80223 80222 1543 5581 5829 51343 5192 1371 387914 1299 2263 1297 5683 586 1545 2582 2120 10643 112755 23274 84824 59352 11336 11315 10788 57491 1284 1021 6461 375346 4915 11252 64983 2005 3984 9435 54535 5799     |
| 28 | cytoplasmic part                          | GO:0044444 | 9.19E-08 | 9.55E-06 | 64518 127833 56992 1893 80223 80222 1543 5581 5829 51343 5192 1371 387914 1299 2263 1297 5683 586 2582 10643 112755 23274 1545 59352 11336 11315 10788 1284 1021 6461 375346 4915 11252 64983 3984 9435 54535 5799                                              |
| 29 | intracellular membrane-bounded organelle  | GO:0043231 | 1.28E-07 | 1.29E-05 | 64518 4915 5396 127833 83593 7799 5799 1893 80223 80222 1543 7716 5829 51343 89797 5192 1371 387914 1299 7553 2263 100526772 1297 5683 1545 2120 10643 112755 23274 389058 59352 11336 11315 1284 1021 375346 5581 11252 64983 55657 2005 3984 9435 54535 22887 |
| 30 | response to stimulus                      | GO:0050896 | 1.69E-07 | 1.64E-05 | 4915 5396 83593 10068 100271715 23328 7799 1893 91653 57491 1543 7716 5829 51343 1371 2263 100526772 5683 1545 3588 112755 389058 59352 2838 11315 10788 1284 1021 6461 375346 5581 6506 2208 5795 3984 9435 168667 5799                                        |
| 31 | anatomical structure morphogenesis        | GO:0009653 | 1.82E-07 | 1.71E-05 | 91653 1545 5396 7716 127833 6461 4915 11252 10643 2702 64518 1284 389058 3984 2263 23328 168667 1297 5683 1893                                                                                                                                                  |
| 32 | system development                        | GO:0048731 | 2.46E-07 | 2.24E-05 | 5396 57465 127833 23328 1893 91653 1545 1543 7716 51343 89797 1299 2263 100526772 1297 5683 2120 2702 389058 1284 1021 6461 4915 6506 3984 168667                                                                                                               |
| 33 | angiogenesis                              | GO:0001525 | 2.64E-07 | 2.33E-05 | 1284 1545 7716 6461 23328 2263 2702 168667 1893                                                                                                                                                                                                                 |
| 34 | regulation of localization                | GO:0032879 | 4.40E-07 | 3.77E-05 | 3782 80223 1545 1021 112755 5581 127833 83593 375346 4915 11252 6506 23328 5795 59352 11315 2702 168667 1893                                                                                                                                                    |
| 35 | endomembrane system                       | GO:0012505 | 5.37E-07 | 4.28E-05 | 64518 127833 1893 80223 1545 1543 5581 51343 387914 1299 2263 1297 112755 23274 59352 11336 11315 1284 375346 4915 11252 3984 9435 5799                                                                                                                         |
| 36 | single organism signaling                 | GO:0044700 | 5.44E-07 | 4.28E-05 | 5396 127833 83593 10068 100271715 23328 1893 91653 80223 1545 5581 5829 2263 5683 3588 2702 59352 2838 11315 10788 1021 112755 6461 375346 4915 6506 2208 5795 3984 168667 5799                                                                                 |
| 37 | signaling                                 | GO:0023052 | 5.56E-07 | 4.28E-05 | 5396 127833 83593 10068 100271715 23328 1893 91653 80223 1545 5581 5829 2263 5683 3588 2702 59352 2838 11315 10788 1021 112755 6461 375346 4915 6506 2208 5795 3984 168667 5799                                                                                 |
| 38 | positive regulation of cell communication | GO:0010647 | 5.58E-07 | 4.28E-05 | 1545 5396 112755 5581 6461 4915 23328 5795 59352 2263 11315 2702 168667 5683 1893                                                                                                                                                                               |

|    |                                                                            |            |          |          |                                                                                                                                                                                                                            |
|----|----------------------------------------------------------------------------|------------|----------|----------|----------------------------------------------------------------------------------------------------------------------------------------------------------------------------------------------------------------------------|
| 39 | cell communication                                                         | GO:0007154 | 6.03E-07 | 4.50E-05 | 5396 127833 83593 10068 100271715 23328 1893 91653 80223 1545 5581 5829 2263 5683 3588 2702 59352 2838 11315 10788 1021 112755 6461 375346 4915 6506 2208 5795 3984 168667 5799                                            |
| 40 | positive regulation of biological process                                  | GO:0048518 | 7.15E-07 | 5.21E-05 | 5396 127833 83593 23328 1893 91653 1545 1543 5581 2208 51343 2263 5683 2702 59352 11315 10788 3782 2120 1021 112755 6461 375346 4915 6506 5795 3984 168667                                                                 |
| 41 | negative regulation of biological process                                  | GO:0048519 | 8.83E-07 | 6.27E-05 | 5396 83593 10068 1893 80223 57491 5581 51343 89932 2263 5683 1284 10643 2702 1545 11315 10788 2120 1021 4915 11252 5795 2005 3984 168667 5799                                                                              |
| 42 | positive regulation of signal transduction                                 | GO:0009967 | 1.12E-06 | 7.74E-05 | 1545 5396 5581 6461 4915 23328 5795 59352 2263 11315 112755 168667 5683 1893                                                                                                                                               |
| 43 | regulation of protein ubiquitination                                       | GO:0031396 | 1.17E-06 | 7.93E-05 | 5581 83593 51343 23328 3984 11315 5683                                                                                                                                                                                     |
| 44 | cell surface receptor signaling pathway                                    | GO:0007166 | 1.28E-06 | 8.46E-05 | 91653 1021 5396 5581 5829 6461 4915 23328 2208 5795 59352 3984 2263 11315 112755 3588 168667 5683 1893                                                                                                                     |
| 45 | localization                                                               | GO:0051179 | 1.49E-06 | 9.62E-05 | 64518 127833 83593 56992 2838 23328 1893 80223 1545 5581 5192 10643 2702 59352 11336 11315 112755 3782 1021 375346 4915 11252 6506 5795 3984 148808 168667 54535 5799                                                      |
| 46 | membrane                                                                   | GO:0016020 | 1.62E-06 | 0.000103 | 64518 127833 56992 11336 6506 91653 80223 1545 1543 5581 5829 51343 5192 1371 387914 2263 100526772 28316 3588 2702 23274 59352 2838 11315 112755 3782 6461 375346 4915 11252 64983 2208 5795 3984 148808 9435 154467 5799 |
| 47 | positive regulation of response to stimulus                                | GO:0048584 | 1.90E-06 | 0.000117 | 1545 5396 5581 2208 6461 4915 23328 5795 59352 3984 2263 11315 112755 168667 5683 1893                                                                                                                                     |
| 48 | regulation of protein modification by small protein conjugation or removal | GO:1903320 | 1.92E-06 | 0.000117 | 5581 83593 51343 23328 3984 11315 5683                                                                                                                                                                                     |
| 49 | cellular response to stimulus                                              | GO:0051716 | 2.41E-06 | 0.000143 | 5396 83593 10068 100271715 23328 1893 91653 1545 1543 5581 5829 51343 2263 5683 3588 112755 389058 59352 2838 11315 10788 1284 1021 6461 375346 4915 6506 2208 5795 3984 168667 5799                                       |
| 50 | movement of cell or subcellular component                                  | GO:0006928 | 2.60E-06 | 0.000151 | 91653 1545 1021 64518 56992 5581 23328 5795 59352 2838 196385 4915 2702 168667 1893                                                                                                                                        |

|    |                                               |            |          |          |                                                                                                                                                            |
|----|-----------------------------------------------|------------|----------|----------|------------------------------------------------------------------------------------------------------------------------------------------------------------|
| 51 | positive regulation of signaling              | GO:0023056 | 3.21E-06 | 0.000183 | 1545 5396 5581 6461 4915 23328 5795 59352 2263 11315 112755 168667 5683 1893                                                                               |
| 52 | cardiovascular system development             | GO:0072358 | 3.69E-06 | 0.000203 | 1284 1545 5396 7716 6461 4915 23328 2263 2702 168667 1893                                                                                                  |
| 53 | circulatory system development                | GO:0072359 | 3.69E-06 | 0.000203 | 1284 1545 5396 7716 6461 4915 23328 2263 2702 168667 1893                                                                                                  |
| 54 | cell projection                               | GO:0042995 | 3.86E-06 | 0.000208 | 91653 1021 57465 64518 5829 4915 11252 6506 2702 3984 5795 196385 11315 10788 5799                                                                         |
| 55 | positive regulation of cellular process       | GO:0048522 | 4.08E-06 | 0.000216 | 5396 127833 83593 23328 1893 91653 1545 1543 5581 51343 2263 5683 2702 59352 11315 10788 3782 2120 1021 112755 6461 4915 5795 3984 168667                  |
| 56 | response to organic substance                 | GO:0010033 | 4.37E-06 | 0.000227 | 1284 1545 1543 5581 5829 10068 4915 6506 7799 23328 1371 3588 389058 5799 2263 11315 168667 5683 1893                                                      |
| 57 | regulation of macromolecule metabolic process | GO:0060255 | 5.95E-06 | 0.000304 | 4915 5396 83593 23328 7799 1893 1545 5581 2208 51343 89932 7553 2263 5683 10643 112755 57491 11315 2120 1021 7716 5795 389058 55657 2005 3984 168667 22887 |
| 58 | axon part                                     | GO:0033267 | 8.17E-06 | 0.00041  | 91653 57465 4915 6506 3984 5799                                                                                                                            |
| 59 | cellular response to organic substance        | GO:0071310 | 8.82E-06 | 0.000432 | 1284 1545 1543 5581 5829 10068 4915 23328 3588 389058 5799 2263 11315 168667 5683 1893                                                                     |
| 60 | regulation of cell communication              | GO:0010646 | 8.96E-06 | 0.000432 | 80223 1545 5396 112755 5581 5829 6461 10068 4915 23328 5795 59352 100271715 2263 11315 2702 168667 5683 1893                                               |
| 61 | negative regulation of protein ubiquitination | GO:0031397 | 9.05E-06 | 0.000432 | 3984 11315 51343 5683 5581                                                                                                                                 |
| 62 | cellular developmental process                | GO:0048869 | 9.24E-06 | 0.000434 | 64518 5396 57465 127833 91653 1543 7716 51343 2263 100526772 1297 2120 84824 1284 1021 6461 4915 11252 2005 3984 168667 54535                              |
| 63 | cell proliferation                            | GO:0008283 | 1.01E-05 | 0.000466 | 5396 2120 1545 1021 1543 83593 56992 51343 5795 2263 4915 100526772 586 168667 1893                                                                        |
| 64 | regulation of signaling                       | GO:0023051 | 1.14E-05 | 0.000519 | 80223 1545 5396 112755 5581 5829 6461 10068 4915 23328 5795 59352 100271715 2263 11315 2702 168667 5683 1893                                               |
| 65 | cellular component organization               | GO:0016043 | 1.26E-05 | 0.000564 | 64518 5396 57465 127833 56992 7799 91653 80222 5581 5829 51343 5192 1299 2263 1297 2702 1545 11315 10788 3782 1284 112755 4915 11252 64983 5795 2005 3984  |

---

|    |                                                                                     |            |          |          |                                                                                                                                                            |
|----|-------------------------------------------------------------------------------------|------------|----------|----------|------------------------------------------------------------------------------------------------------------------------------------------------------------|
| 66 | negative regulation of protein modification by small protein conjugation or removal | GO:1903321 | 1.29E-05 | 0.000568 | 3984 11315 51343 5683 5581                                                                                                                                 |
| 67 | tissue development                                                                  | GO:0009888 | 1.34E-05 | 0.000581 | 5396 1284 1545 1021 1543 7716 51343 2702 2263 100526772 168667 1297 5683 1893                                                                              |
| 68 | regulation of molecular function                                                    | GO:0065009 | 1.43E-05 | 0.000612 | 1545 57465 5581 2208 375346 51343 23328 89932 5795 4915 5799 100271715 3984 2263 11315 10788 5683 1893                                                     |
| 69 | negative regulation of molecular function                                           | GO:0044092 | 1.54E-05 | 0.000649 | 1545 5581 51343 89932 5795 5799 3984 11315 10788 5683 1893                                                                                                 |
| 70 | presynaptic process involved in chemical synaptic transmission                      | GO:0099531 | 1.62E-05 | 0.000674 | 127833 11315 4915 5799 112755                                                                                                                              |
| 71 | response to chemical                                                                | GO:0042221 | 1.88E-05 | 0.00076  | 10068 23328 7799 1893 91653 57491 1543 5581 5829 1371 2263 5683 3588 1545 11315 1284 4915 6506 5795 389058 168667 5799                                     |
| 72 | regulation of metabolic process                                                     | GO:0019222 | 1.88E-05 | 0.00076  | 4915 5396 83593 23328 7799 1893 1545 5581 2208 51343 89932 7553 2263 5683 10643 112755 57491 11315 2120 1021 7716 5795 389058 55657 2005 3984 168667 22887 |
| 73 | regulation of catalytic activity                                                    | GO:0050790 | 1.92E-05 | 0.000764 | 4915 57465 5581 2208 51343 23328 89932 5795 5799 100271715 3984 2263 11315 10788 5683 1893                                                                 |
| 74 | cellular component organization or biogenesis                                       | GO:0071840 | 2.02E-05 | 0.000795 | 64518 5396 57465 127833 56992 7799 91653 80222 5581 5829 51343 5192 1299 2263 1297 2702 1545 11315 10788 3782 1284 112755 4915 11252 64983 5795 2005 3984  |
| 75 | regulation of multicellular organismal process                                      | GO:0051239 | 2.15E-05 | 0.000836 | 1284 80223 1545 1021 5396 5581 127833 4915 10643 23328 3984 2263 11315 2702 168667 5683 1893                                                               |
| 76 | secretory granule membrane                                                          | GO:0030667 | 2.71E-05 | 0.001037 | 127833 64518 5799 11336                                                                                                                                    |
| 77 | secretion by cell                                                                   | GO:0032940 | 2.83E-05 | 0.00106  | 80223 5581 127833 4915 6506 2702 11336 112755 5799 1893                                                                                                    |
| 78 | negative regulation of ubiquitin-protein transferase activity                       | GO:0051444 | 2.84E-05 | 0.00106  | 3984 11315 51343 5683                                                                                                                                      |

---

|    |                                           |            |          |          |                                                                                                                                                                                                                |
|----|-------------------------------------------|------------|----------|----------|----------------------------------------------------------------------------------------------------------------------------------------------------------------------------------------------------------------|
| 79 | cell differentiation                      | GO:0030154 | 2.98E-05 | 0.001098 | 91653 4915 1021 1543 57465 7716 127833 6461 51343 54535 1284 84824 2005 3984 2263 100526772 168667 1297 2120 5396                                                                                              |
| 80 | axon                                      | GO:0030424 | 3.19E-05 | 0.001149 | 91653 57465 4915 6506 3984 11315 5799                                                                                                                                                                          |
| 81 | regulation of signal transduction         | GO:0009966 | 3.20E-05 | 0.001149 | 1545 5396 5581 5829 6461 10068 4915 23328 5795 59352 100271715 2263 11315 112755 168667 5683 1893                                                                                                              |
| 82 | extracellular matrix                      | GO:0031012 | 3.33E-05 | 0.001169 | 1284 89797 89932 1299 2263 1297 1893                                                                                                                                                                           |
| 83 | presynapse                                | GO:0098793 | 3.33E-05 | 0.001169 | 57465 127833 4915 112755 11315 5799                                                                                                                                                                            |
| 84 | negative regulation of cellular process   | GO:0048523 | 3.39E-05 | 0.001174 | 5396 83593 10068 1893 80223 57491 5581 51343 89932 2263 5683 10643 1545 11315 2120 1021 4915 11252 5795 2005 3984 168667                                                                                       |
| 85 | regulation of response to stimulus        | GO:0048583 | 3.51E-05 | 0.001203 | 1545 1021 5396 5581 5829 6461 10068 4915 23328 2208 5795 59352 100271715 3984 2263 11315 112755 168667 5683 1893                                                                                               |
| 86 | regulation of cellular component movement | GO:0051270 | 3.72E-05 | 0.001258 | 1545 1021 5581 23328 5795 59352 2702 168667 1893                                                                                                                                                               |
| 87 | aging                                     | GO:0007568 | 3.95E-05 | 0.001322 | 51343 1021 1543 4915 6506 7799                                                                                                                                                                                 |
| 88 | signal transduction                       | GO:0007165 | 4.01E-05 | 0.001327 | 5396 83593 10068 100271715 23328 1893 91653 1545 5581 5829 2263 5683 3588 112755 59352 2838 11315 10788 1021 6461 375346 4915 2208 5795 3984 168667                                                            |
| 89 | regulation of neurotransmitter levels     | GO:0001505 | 4.31E-05 | 0.001412 | 127833 11315 4915 5799 112755                                                                                                                                                                                  |
| 90 | neurotransmitter transport                | GO:0006836 | 5.02E-05 | 0.001626 | 127833 11315 4915 5799 112755                                                                                                                                                                                  |
| 91 | negative regulation of catalytic activity | GO:0043086 | 5.82E-05 | 0.001863 | 51343 89932 5795 5799 3984 11315 10788 5683 1893                                                                                                                                                               |
| 92 | locomotion                                | GO:0040011 | 6.03E-05 | 0.00191  | 91653 1545 1021 64518 5581 23328 5795 59352 2838 4915 168667 1893                                                                                                                                              |
| 93 | cell-cell signaling                       | GO:0007267 | 6.23E-05 | 0.00195  | 5799 80223 5581 127833 4915 6506 2702 59352 2263 11315 112755 5683                                                                                                                                             |
| 94 | organic substance metabolic process       | GO:0071704 | 7.10E-05 | 0.002199 | 51059 5396 83593 23328 7799 5799 1893 89932 80222 1543 7716 2208 51343 1371 7553 2263 5683 586 1545 2582 2120 10643 112755 389058 11315 57491 4915 1284 1021 5581 64983 5795 55657 2005 3984 9435 168667 22887 |
| 95 | cell motility                             | GO:0048870 | 7.99E-05 | 0.002422 | 64518 1545 1021 5581 4915 23328 5795 59352 2838 168667 1893                                                                                                                                                    |
| 96 | localization of cell                      | GO:0051674 | 7.99E-05 | 0.002422 | 64518 1545 1021 5581 4915 23328 5795 59352 2838 168667 1893                                                                                                                                                    |



|     |                                                                         |            |          |          |                                                                                                                                                                                                                |
|-----|-------------------------------------------------------------------------|------------|----------|----------|----------------------------------------------------------------------------------------------------------------------------------------------------------------------------------------------------------------|
| 97  | secretion                                                               | GO:0046903 | 8.09E-05 | 0.002428 | 80223 5581 127833 4915 6506 2702 11336 112755 5799 1893                                                                                                                                                        |
| 98  | cellular response to chemical stimulus                                  | GO:0070887 | 8.24E-05 | 0.002449 | 1284 1545 1543 5581 5829 10068 4915 23328 3588 389058 5799 2263 11315 168667 5683 1893                                                                                                                         |
| 99  | sensory organ development                                               | GO:0007423 | 9.35E-05 | 0.00275  | 1545 5396 51343 2263 4915 168667 1543                                                                                                                                                                          |
| 100 | positive regulation of intracellular signal transduction                | GO:1902533 | 0.000101 | 0.002933 | 1545 5581 4915 23328 5795 2263 11315 168667 1893                                                                                                                                                               |
| 101 | cell leading edge                                                       | GO:0031252 | 0.000103 | 0.002976 | 1021 5829 11252 6506 5795 10788                                                                                                                                                                                |
| 102 | proteinaceous extracellular matrix                                      | GO:0005578 | 0.00011  | 0.003132 | 1284 89797 89932 1299 1297 1893                                                                                                                                                                                |
| 103 | regulation of ubiquitin-protein transferase activity                    | GO:0051438 | 0.000116 | 0.003275 | 3984 11315 51343 5683                                                                                                                                                                                          |
| 104 | FACIT collagen trimer                                                   | GO:0005593 | 0.000119 | 0.003302 | 1299 1297                                                                                                                                                                                                      |
| 105 | extracellular matrix structural constituent conferring tensile strength | GO:0030020 | 0.000119 | 0.003302 | 1299 1297                                                                                                                                                                                                      |
| 106 | regulation of cell motility                                             | GO:2000145 | 0.000134 | 0.003668 | 1545 1021 5581 23328 5795 59352 168667 1893                                                                                                                                                                    |
| 107 | regulation of primary metabolic process                                 | GO:0080090 | 0.000146 | 0.003976 | 4915 5396 83593 23328 7799 1893 1545 5581 51343 89932 7553 2263 5683 10643 57491 11315 2120 7716 5795 389058 55657 2005 3984 168667 22887                                                                      |
| 108 | metabolic process                                                       | GO:0008152 | 0.000157 | 0.004233 | 51059 5396 83593 23328 7799 5799 1893 89932 80222 1543 7716 2208 51343 1371 7553 2263 5683 586 1545 2582 2120 10643 112755 389058 11315 57491 4915 1284 1021 5581 64983 5795 55657 2005 3984 9435 168667 22887 |
| 109 | vesicle                                                                 | GO:0031982 | 0.000159 | 0.004254 | 5799 1284 80223 2582 112755 64518 2208 10068 11252 5683 3588 5795 59352 11336 2263 11315 10788 127833 1893                                                                                                     |
| 110 | response to stress                                                      | GO:0006950 | 0.000164 | 0.004337 | 5396 91653 9435 1021 1543 7716 5829 5581 10068 51343 6506 23328 3588 1545 4915 11315 100526772 5683 1893                                                                                                       |
| 111 | cellular response to reactive oxygen species                            | GO:0034614 | 0.000168 | 0.0044   | 5829 10068 1545 11315                                                                                                                                                                                          |
| 112 | regulation of cellular                                                  | GO:0031323 | 0.000171 | 0.004449 | 4915 5396 83593 23328 7799 1893 1545 5581 51343 89932 7553 2263 5683 10643 57491 11315 2120 7716 5795 389058 55657 2005 39                                                                                     |

---

|     |                                                           |            |          |          |                                                                                                                                                                                       |
|-----|-----------------------------------------------------------|------------|----------|----------|---------------------------------------------------------------------------------------------------------------------------------------------------------------------------------------|
|     | metabolic process                                         |            |          |          | 84 168667 22887                                                                                                                                                                       |
| 113 | regulation of locomotion                                  | GO:0040012 | 0.000175 | 0.004498 | 1545 1021 5581 23328 5795 59352 168667 1893                                                                                                                                           |
| 114 | organelle membrane                                        | GO:0031090 | 0.000183 | 0.004671 | 64518 80223 4915 127833 51343 11252 64983 5192 1371 23274 59352 11336 11315 9435 5799                                                                                                 |
| 115 | negative regulation of cellular protein metabolic process | GO:0032269 | 0.00019  | 0.004758 | 5581 51343 10643 89932 5795 3984 11315 5683 1893                                                                                                                                      |
| 116 | intracellular organelle lumen                             | GO:0070013 | 0.000193 | 0.004758 | 2120 1284 80222 1021 5396 7716 5829 51343 11252 64983 89797 1371 1299 5799 2005 3984 2263 11315 1297 5683 1893                                                                        |
| 117 | membrane-enclosed lumen                                   | GO:0031974 | 0.000194 | 0.004758 | 2120 1284 80222 1021 5396 7716 5829 51343 11252 64983 89797 1371 1299 5799 2005 3984 2263 11315 1297 5683 1893                                                                        |
| 118 | organelle lumen                                           | GO:0043233 | 0.000194 | 0.004758 | 2120 1284 80222 1021 5396 7716 5829 51343 11252 64983 89797 1371 1299 5799 2005 3984 2263 11315 1297 5683 1893                                                                        |
| 119 | animal organ development                                  | GO:0048513 | 0.000194 | 0.004758 | 5396 2120 1545 1021 1543 51343 6506 2702 1299 389058 2263 4915 100526772 168667 1297 5683 1893                                                                                        |
| 120 | macromolecule metabolic process                           | GO:0043170 | 0.0002   | 0.004855 | 4915 5396 83593 23328 7799 5799 1893 80222 7716 2208 51343 89932 7553 2263 5683 1545 2120 10643 112755 389058 11315 57491 1284 1021 5581 64983 5795 55657 2005 3984 9435 168667 22887 |
| 121 | cytosol                                                   | GO:0005829 | 0.000204 | 0.0049   | 586 4915 1021 2582 5581 5829 6461 56992 51343 11252 10643 112755 127833 11336 3984 11315 10788 5683                                                                                   |
| 122 | neurotransmitter secretion                                | GO:0007269 | 0.000222 | 0.005264 | 127833 4915 5799 112755                                                                                                                                                               |
| 123 | signal release from synapse                               | GO:0099643 | 0.000222 | 0.005264 | 127833 4915 5799 112755                                                                                                                                                               |
| 124 | omega-hydroxylase P450 pathway                            | GO:0097267 | 0.000233 | 0.005385 | 1545 1543                                                                                                                                                                             |
| 125 | synaptic signaling                                        | GO:0099536 | 0.000237 | 0.005385 | 5581 127833 4915 6506 112755 11315 5799                                                                                                                                               |
| 126 | anterograde trans-synaptic signaling                      | GO:0098916 | 0.000237 | 0.005385 | 5581 127833 4915 6506 112755 11315 5799                                                                                                                                               |
| 127 | chemical synaptic transmission                            | GO:0007268 | 0.000237 | 0.005385 | 5581 127833 4915 6506 112755 11315 5799                                                                                                                                               |
| 128 | trans-synaptic signaling                                  | GO:0099537 | 0.000237 | 0.005385 | 5581 127833 4915 6506 112755 11315 5799                                                                                                                                               |
| 129 | negative regulation of macromolecule metabolic process    | GO:0010605 | 0.00025  | 0.005647 | 2120 57491 5396 5581 51343 10643 89932 5795 2005 3984 2263 11315 5683 1893                                                                                                            |

---

|     |                                                   |            |          |          |                                                                                                                                                                                               |
|-----|---------------------------------------------------|------------|----------|----------|-----------------------------------------------------------------------------------------------------------------------------------------------------------------------------------------------|
| 130 | response to oxygen-containing compound            | GO:1901700 | 0.000256 | 0.005694 | 1545 1543 5581 5829 10068 4915 6506 23328 7799 11315 5799                                                                                                                                     |
| 131 | regulation of anatomical structure morphogenesis  | GO:0022603 | 0.000256 | 0.005694 | 1284 1545 127833 4915 23328 3984 2263 5683 1893                                                                                                                                               |
| 132 | signal release                                    | GO:0023061 | 0.000269 | 0.005925 | 80223 5581 127833 4915 112755 5799                                                                                                                                                            |
| 133 | negative regulation of cellular metabolic process | GO:0031324 | 0.000275 | 0.006014 | 2120 57491 5396 5581 51343 10643 89932 5795 2005 3984 2263 11315 5683 1893                                                                                                                    |
| 134 | regulation of cellular protein metabolic process  | GO:0032268 | 0.000281 | 0.006102 | 4915 5581 83593 51343 10643 23328 89932 5795 3984 2263 11315 168667 5683 1893                                                                                                                 |
| 135 | negative regulation of protein metabolic process  | GO:0051248 | 0.000289 | 0.006244 | 5581 51343 10643 89932 5795 3984 11315 5683 1893                                                                                                                                              |
| 136 | cytoplasmic vesicle part                          | GO:0044433 | 0.000292 | 0.00626  | 64518 80223 127833 11252 11336 5799 1893                                                                                                                                                      |
| 137 | intracellular signal transduction                 | GO:0035556 | 0.000298 | 0.006301 | 1545 5581 83593 375346 4915 23328 5795 100271715 3984 2263 11315 10788 168667 5683 1893                                                                                                       |
| 138 | gene expression                                   | GO:0010467 | 0.000299 | 0.006301 | 5396 7799 1893 80222 7716 7553 2263 5683 1284 10643 112755 1545 11315 57491 2120 1021 4915 64983 389058 55657 2005 168667 22887                                                               |
| 139 | membrane-bounded vesicle                          | GO:0031988 | 0.000304 | 0.006361 | 5799 1284 80223 2582 64518 2208 10068 11252 112755 3588 5795 5683 11336 2263 11315 10788 127833 1893                                                                                          |
| 140 | regulation of gene expression                     | GO:0010468 | 0.000347 | 0.007218 | 2120 1545 57491 1021 5396 7716 4915 10643 112755 7799 389058 55657 22887 2005 7553 2263 11315 168667 5683 1893                                                                                |
| 141 | neuron part                                       | GO:0097458 | 0.000357 | 0.00738  | 3782 91653 57465 127833 4915 6506 112755 3984 11315 5799                                                                                                                                      |
| 142 | single-organism transport                         | GO:0044765 | 0.000374 | 0.007669 | 3782 80223 112755 5581 127833 375346 4915 6506 2702 11336 3984 11315 5192 5799 1893                                                                                                           |
| 143 | toxin metabolic process                           | GO:0009404 | 0.000384 | 0.007757 | 1545 1543                                                                                                                                                                                     |
| 144 | response to insecticide                           | GO:0017085 | 0.000384 | 0.007757 | 1371 1543                                                                                                                                                                                     |
| 145 | cellular metabolic process                        | GO:0044237 | 0.000386 | 0.007757 | 51059 5396 83593 23328 7799 5799 1893 89932 80222 1543 7716 51343 1371 7553 2263 5683 586 1545 2120 10643 389058 11315 57491 4915 1284 1021 5581 64983 5795 55657 2005 3984 9435 168667 22887 |
| 146 | microtubule cytoskeleton                          | GO:0015630 | 0.00039  | 0.007781 | 64518 1021 5829 83593 56992 112755 196385 10788 54535                                                                                                                                         |

|     |                                                          |            |          |          |                                                                                                                                                         |
|-----|----------------------------------------------------------|------------|----------|----------|---------------------------------------------------------------------------------------------------------------------------------------------------------|
| 147 | terminal bouton                                          | GO:0043195 | 0.000396 | 0.007848 | 4915 5799 57465                                                                                                                                         |
| 148 | cell periphery                                           | GO:0071944 | 0.000428 | 0.008412 | 127833 2838 91653 5581 5829 2263 28316 3588 2702 59352 11336 11315 112755 3782 6461 375346 4915 11252 6506 2208 5795 5799                               |
| 149 | regulation of hydrolase activity                         | GO:0051336 | 0.000433 | 0.008457 | 57465 5581 4915 89932 100271715 2263 11315 10788 5799 1893                                                                                              |
| 150 | secretory vesicle                                        | GO:0099503 | 0.000463 | 0.008986 | 64518 127833 112755 11336 5799 1893                                                                                                                     |
| 151 | heterocyclic compound binding                            | GO:1901363 | 0.000466 | 0.008992 | 4915 5396 56992 7799 196385 80222 1543 7716 89797 7553 2263 10643 1545 11315 57491 2120 1021 5581 64983 389058 55657 2005 3984 22887                    |
| 152 | membrane part                                            | GO:0044425 | 0.000492 | 0.009427 | 387914 91653 1545 1543 2208 5192 127833 2263 100526772 28316 3588 2702 59352 2838 11315 112755 3782 375346 4915 11252 6506 5795 148808 9435 154467 5799 |
| 153 | molecular function regulator                             | GO:0098772 | 0.0005   | 0.009525 | 57465 5581 375346 51343 89932 100271715 2263 11315 10788 10068                                                                                          |
| 154 | whole membrane                                           | GO:0098805 | 0.000509 | 0.009627 | 64518 80223 127833 4915 11252 5192 23274 11336 11315 5799                                                                                               |
| 155 | regulation of cell migration                             | GO:0030334 | 0.000516 | 0.009691 | 1545 5581 23328 5795 59352 168667 1893                                                                                                                  |
| 156 | regulation of protein metabolic process                  | GO:0051246 | 0.000524 | 0.009789 | 4915 5581 83593 51343 10643 23328 89932 5795 3984 2263 11315 168667 5683 1893                                                                           |
| 157 | cytoplasmic vesicle membrane                             | GO:0030659 | 0.000534 | 0.009903 | 64518 80223 127833 11252 11336 5799                                                                                                                     |
| 158 | skeletal system development                              | GO:0001501 | 0.000557 | 0.010273 | 5396 2702 389058 2263 100526772 1297                                                                                                                    |
| 159 | organic cyclic compound binding                          | GO:0097159 | 0.000571 | 0.010361 | 4915 5396 56992 7799 196385 80222 1543 7716 89797 7553 2263 10643 1545 11315 57491 2120 1021 5581 64983 389058 55657 2005 3984 22887                    |
| 160 | endoplasmic reticulum                                    | GO:0005783 | 0.000572 | 0.010361 | 1284 1545 1543 5581 387914 375346 4915 1299 11315 1297 5799                                                                                             |
| 161 | negative regulation of metabolic process                 | GO:0009892 | 0.000573 | 0.010361 | 2120 57491 5396 5581 51343 10643 89932 5795 2005 3984 2263 11315 5683 1893                                                                              |
| 162 | anatomical structure formation involved in morphogenesis | GO:0048646 | 0.000607 | 0.010915 | 1284 1545 7716 6461 23328 2263 2702 168667 1893                                                                                                         |
| 163 | positive regulation of protein                           | GO:0031401 | 0.000615 | 0.010919 | 4915 5581 83593 51343 23328 2263 11315 168667 5683                                                                                                      |

---

|     |                                                                     |            |          |          |                                                                                                                                                                          |
|-----|---------------------------------------------------------------------|------------|----------|----------|--------------------------------------------------------------------------------------------------------------------------------------------------------------------------|
|     | modification process                                                |            |          |          |                                                                                                                                                                          |
| 164 | extracellular matrix<br>structural constituent                      | GO:0005201 | 0.000615 | 0.010919 | 1284 1299 1297                                                                                                                                                           |
| 165 | regulation of protein<br>modification process                       | GO:0031399 | 0.000627 | 0.010996 | 4915 5581 83593 51343 23328 5795 3984 2263 11315 168667 5683                                                                                                             |
| 166 | extracellular matrix<br>organization                                | GO:0030198 | 0.00063  | 0.010996 | 1284 11315 1299 1297 1545                                                                                                                                                |
| 167 | extracellular region part                                           | GO:0044421 | 0.000633 | 0.010996 | 1284 2582 64518 2208 10068 11252 89797 89932 3588 5795 1299 2263 11315 10788 168667 1297 5683 1893                                                                       |
| 168 | cellular response to<br>hydrogen peroxide                           | GO:0070301 | 0.000638 | 0.010996 | 10068 1545 11315                                                                                                                                                         |
| 169 | extracellular structure<br>organization                             | GO:0043062 | 0.000639 | 0.010996 | 1284 11315 1299 1297 1545                                                                                                                                                |
| 170 | calcium-mediated signaling<br>using intracellular calcium<br>source | GO:0035584 | 0.000642 | 0.010996 | 375346 4915                                                                                                                                                              |
| 171 | vesicle membrane                                                    | GO:0012506 | 0.000653 | 0.011063 | 64518 80223 127833 11252 11336 5799                                                                                                                                      |
| 172 | cellular macromolecule<br>metabolic process                         | GO:0044260 | 0.000653 | 0.011063 | 4915 5396 83593 23328 7799 5799 1893 80222 5581 51343 89932 7553 2263 5683 1545 2120 10643 389058 11315 57491 1284 1021 77<br>16 64983 5795 55657 2005 3984 168667 22887 |
| 173 | cellular response to oxygen-<br>containing compound                 | GO:1901701 | 0.000658 | 0.011073 | 1545 5581 5829 10068 4915 23328 11315 5799                                                                                                                               |
| 174 | regulation of developmental<br>process                              | GO:0050793 | 0.000686 | 0.011483 | 1284 1545 1021 5396 91653 127833 51343 23328 3984 2263 4915 5683 1893                                                                                                    |
| 175 | cell projection part                                                | GO:0044463 | 0.000701 | 0.011663 | 91653 57465 4915 11252 6506 5795 3984 5799                                                                                                                               |
| 176 | regulation of multicellular<br>organismal development               | GO:2000026 | 0.000709 | 0.011736 | 1284 1545 1021 5396 127833 4915 23328 3984 2263 5683 1893                                                                                                                |
| 177 | negative regulation of cell                                         | GO:0090344 | 0.000716 | 0.01174  | 51343 1021                                                                                                                                                               |

---

---

|     |                                                         |            |          |          |                                                                                                                                                                                           |
|-----|---------------------------------------------------------|------------|----------|----------|-------------------------------------------------------------------------------------------------------------------------------------------------------------------------------------------|
|     | aging                                                   |            |          |          |                                                                                                                                                                                           |
| 178 | transport                                               | GO:0006810 | 0.000718 | 0.01174  | 3782 80223 112755 5581 127833 375346 4915 11252 10643 2702 56992 6506 11336 3984 148808 11315 5192 54535 5799 1893                                                                        |
| 179 | positive regulation of multicellular organismal process | GO:0051240 | 0.000723 | 0.011758 | 1545 5581 127833 4915 23328 3984 2263 11315 2702 1893                                                                                                                                     |
| 180 | cytoplasmic, membrane-bounded vesicle                   | GO:0016023 | 0.00073  | 0.011816 | 64518 80223 127833 11252 112755 11336 2263 5799 1893                                                                                                                                      |
| 181 | epoxygenase P450 pathway                                | GO:0019373 | 0.000795 | 0.01272  | 1545 1543                                                                                                                                                                                 |
| 182 | bounding membrane of organelle                          | GO:0098588 | 0.000812 | 0.012741 | 64518 80223 127833 4915 11252 5192 23274 59352 11336 9435 5799                                                                                                                            |
| 183 | cell migration                                          | GO:0016477 | 0.000814 | 0.012741 | 1545 5581 4915 23328 5795 59352 2838 168667 1893                                                                                                                                          |
| 184 | single-organism localization                            | GO:1902578 | 0.000814 | 0.012741 | 3782 80223 112755 5581 127833 375346 4915 6506 2702 11336 3984 11315 5192 5799 1893                                                                                                       |
| 185 | primary metabolic process                               | GO:0044238 | 0.000831 | 0.01294  | 51059 5396 83593 23328 7799 5799 1893 80222 1543 7716 51343 89932 7553 2263 5683 1545 2582 2120 10643 389058 11315 57491 4915 1284 1021 5581 64983 5795 55657 2005 3984 9435 168667 22887 |
| 186 | reactive oxygen species biosynthetic process            | GO:1903409 | 0.000842 | 0.01304  | 11315 1545 1543                                                                                                                                                                           |
| 187 | axonal growth cone                                      | GO:0044295 | 0.000877 | 0.01352  | 3984 91653                                                                                                                                                                                |
| 188 | integral component of membrane                          | GO:0016021 | 0.000884 | 0.013544 | 387914 91653 2208 5192 127833 2263 100526772 28316 3588 112755 59352 2838 2702 3782 375346 4915 6506 5795 148808 9435 154467 5799                                                         |
| 189 | endoplasmic reticulum lumen                             | GO:0005788 | 0.000894 | 0.01363  | 1284 1299 1297 5799                                                                                                                                                                       |
| 190 | synapse                                                 | GO:0045202 | 0.0009   | 0.013653 | 57465 127833 4915 112755 2263 11315 5799                                                                                                                                                  |
| 191 | negative regulation of transferase activity             | GO:0051348 | 0.000909 | 0.013654 | 3984 5795 51343 11315 5683                                                                                                                                                                |
| 192 | organic substance transport                             | GO:0071702 | 0.00091  | 0.013654 | 3782 80223 112755 5581 375346 4915 10643 2702 6506 11336 11315 5192 54535 5799                                                                                                            |
| 193 | collagen trimer                                         | GO:0005581 | 0.000928 | 0.013856 | 1284 1299 1297                                                                                                                                                                            |

---

|     |                                             |            |          |          |                                                                                                                                   |
|-----|---------------------------------------------|------------|----------|----------|-----------------------------------------------------------------------------------------------------------------------------------|
| 194 | regulation of cellular component biogenesis | GO:0044087 | 0.000951 | 0.014054 | 5581 4915 112755 5795 3984 11315 10788                                                                                            |
| 195 | organic substance biosynthetic process      | GO:1901576 | 0.000958 | 0.01409  | 5396 7799 1893 80222 1543 7716 2208 1371 7553 2263 586 1284 10643 1545 11315 57491 2120 64983 389058 55657 2005 9435 168667 22887 |
| 196 | secretory granule                           | GO:0030141 | 0.000967 | 0.014152 | 127833 64518 11336 5799 1893                                                                                                      |
| 197 | ion binding                                 | GO:0043167 | 0.000991 | 0.014353 | 89932 1545 1543 7716 5829 83593 5581 11252 28316 7799 2208 389058 55657 3984 11315 5192 1297 127833 7553                          |
| 198 | establishment of localization               | GO:0051234 | 0.00102  | 0.014653 | 3782 80223 112755 5581 127833 375346 4915 11252 10643 2702 56992 6506 11336 3984 148808 11315 5192 54535 5799 1893                |
| 199 | enzyme binding                              | GO:0019899 | 0.001023 | 0.014653 | 80223 1543 112755 5581 5829 4915 23328 5795 11315 10788 1893                                                                      |
| 200 | cell projection organization                | GO:0030030 | 0.001027 | 0.014653 | 91653 5396 57465 64518 127833 4915 11252 3984 2263                                                                                |
| 201 | protein complex                             | GO:0043234 | 0.00106  | 0.015046 | 1284 10788 1021 112755 5829 56992 51343 23328 3588 1299 5799 11336 196385 11315 2702 1297 5683 4915                               |
| 202 | response to toxic substance                 | GO:0009636 | 0.001067 | 0.015046 | 1371 11315 1545 1543                                                                                                              |
| 203 | epithelial cell differentiation             | GO:0030855 | 0.001074 | 0.015046 | 1021 1543 7716 51343 2263 168667                                                                                                  |
| 204 | protein ubiquitination                      | GO:0016567 | 0.001075 | 0.015046 | 5581 83593 51343 23328 3984 11315 5683                                                                                            |
| 205 | regulation of angiogenesis                  | GO:0045765 | 0.001104 | 0.015389 | 1284 1893 1545 23328                                                                                                              |
| 206 | macromolecule biosynthetic process          | GO:0009059 | 0.001154 | 0.015962 | 2120 1284 80222 5396 1545 7716 2208 64983 10643 7799 57491 55657 389058 2005 7553 2263 11315 9435 168667 22887 1893               |
| 207 | response to reactive oxygen species         | GO:0000302 | 0.001162 | 0.015962 | 5829 10068 1545 11315                                                                                                             |
| 208 | regulation of transport                     | GO:0051049 | 0.001178 | 0.016098 | 3782 80223 5581 127833 375346 4915 11252 6506 2702 11315 112755                                                                   |
| 209 | biosynthetic process                        | GO:0009058 | 0.0012   | 0.016263 | 5396 7799 1893 80222 1543 7716 2208 1371 7553 2263 586 1284 10643 1545 11315 57491 2120 64983 389058 55657 2005 9435 168667 22887 |
| 210 | intrinsic component of membrane             | GO:0031224 | 0.001201 | 0.016263 | 387914 91653 2208 5192 127833 2263 100526772 28316 3588 112755 59352 2838 2702 3782 375346 4915 6506 5795 148808 9435 154467 5799 |
| 211 | epithelial cell migration                   | GO:0010631 | 0.001222 | 0.016471 | 1545 5581 168667 23328                                                                                                            |
| 212 | cellular response to oxidative stress       | GO:0034599 | 0.001242 | 0.016654 | 5829 10068 1545 11315                                                                                                             |

|     |                                                     |            |          |          |                                                                                                               |
|-----|-----------------------------------------------------|------------|----------|----------|---------------------------------------------------------------------------------------------------------------|
| 213 | aromatase activity                                  | GO:0070330 | 0.001247 | 0.016654 | 1545 1543                                                                                                     |
| 214 | negative regulation of protein modification process | GO:0031400 | 0.001265 | 0.016777 | 5581 51343 5795 3984 11315 5683                                                                               |
| 215 | positive regulation of molecular function           | GO:0044093 | 0.00127  | 0.016777 | 57465 5581 2208 375346 51343 23328 100271715 2263 11315 10788 5683                                            |
| 216 | cell projection morphogenesis                       | GO:0048858 | 0.001275 | 0.016777 | 91653 64518 127833 4915 11252 3984 2263                                                                       |
| 217 | epithelium migration                                | GO:0090132 | 0.001284 | 0.016777 | 1545 5581 168667 23328                                                                                        |
| 218 | cytoplasmic vesicle                                 | GO:0031410 | 0.00129  | 0.016777 | 64518 80223 127833 11252 112755 11336 2263 5799 1893                                                          |
| 219 | positive regulation of catalytic activity           | GO:0043085 | 0.001291 | 0.016777 | 57465 5581 2208 51343 23328 100271715 2263 11315 10788 5683                                                   |
| 220 | intracellular vesicle                               | GO:0097708 | 0.001304 | 0.016875 | 64518 80223 127833 11252 112755 11336 2263 5799 1893                                                          |
| 221 | protein localization                                | GO:0008104 | 0.001324 | 0.017019 | 3782 80223 112755 5581 83593 375346 11252 2702 11336 11315 5192 54535 5799                                    |
| 222 | positive regulation of cell-substrate adhesion      | GO:0010811 | 0.001327 | 0.017019 | 5795 1021 5581                                                                                                |
| 223 | exocytosis                                          | GO:0006887 | 0.001376 | 0.017539 | 127833 80223 11336 112755 1893                                                                                |
| 224 | cellular localization                               | GO:0051641 | 0.001379 | 0.017539 | 3782 5581 127833 83593 375346 4915 11252 5192 11336 11315 112755 54535 5799                                   |
| 225 | protein transport                                   | GO:0015031 | 0.0014   | 0.017721 | 3782 80223 112755 5581 375346 2702 11336 11315 5192 54535 5799                                                |
| 226 | tissue migration                                    | GO:0090130 | 0.001414 | 0.017821 | 1545 5581 168667 23328                                                                                        |
| 227 | response to external stimulus                       | GO:0009605 | 0.001431 | 0.017965 | 91653 1021 1543 5581 3588 10068 4915 6506 23328 5795 11315 5683                                               |
| 228 | negative regulation of hydrolase activity           | GO:0051346 | 0.001455 | 0.018188 | 89932 11315 10788 5799 1893                                                                                   |
| 229 | cell part morphogenesis                             | GO:0032990 | 0.001472 | 0.018315 | 91653 64518 127833 4915 11252 3984 2263                                                                       |
| 230 | cellular protein metabolic process                  | GO:0044267 | 0.001484 | 0.01833  | 89932 80222 1021 5581 83593 51343 64983 23328 7799 5795 4915 5799 10643 2005 3984 2263 11315 168667 5683 1893 |
| 231 | immune system process                               | GO:0002376 | 0.001486 | 0.01833  | 2120 1021 5581 2208 10068 3588 5795 2838 3984 2263 56992 5683 1893                                            |



---

|     |                                                                                                                                                                                                               |            |          |          |                                                                                                    |
|-----|---------------------------------------------------------------------------------------------------------------------------------------------------------------------------------------------------------------|------------|----------|----------|----------------------------------------------------------------------------------------------------|
| 232 | neuron projection<br>development                                                                                                                                                                              | GO:0031175 | 0.001503 | 0.01847  | 91653 5396 57465 127833 4915 3984 2263                                                             |
| 233 | metal ion binding                                                                                                                                                                                             | GO:0046872 | 0.001519 | 0.018521 | 89932 1545 1543 7716 5829 83593 5581 28316 7799 2208 389058 55657 3984 11315 5192 1297 127833 7553 |
| 234 | synapse part                                                                                                                                                                                                  | GO:0044456 | 0.001532 | 0.018521 | 57465 127833 4915 112755 11315 5799                                                                |
| 235 | microtubule                                                                                                                                                                                                   | GO:0005874 | 0.001538 | 0.018521 | 196385 83593 56992 10788 64518                                                                     |
| 236 | single-organism catabolic<br>process                                                                                                                                                                          | GO:0044712 | 0.001546 | 0.018521 | 586 1284 1545 1543 5581 11315 2582                                                                 |
| 237 | macromolecule localization                                                                                                                                                                                    | GO:0033036 | 0.001549 | 0.018521 | 3782 80223 112755 5581 83593 375346 11252 10643 2702 11336 11315 5192 54535 5799                   |
| 238 | regulation of vasculature<br>development                                                                                                                                                                      | GO:1901342 | 0.001553 | 0.018521 | 1284 1893 1545 23328                                                                               |
| 239 | response to xenobiotic<br>stimulus                                                                                                                                                                            | GO:0009410 | 0.001561 | 0.018521 | 1545 57491 1543                                                                                    |
| 240 | epithelium development                                                                                                                                                                                        | GO:0060429 | 0.001563 | 0.018521 | 1021 1543 7716 51343 2702 2263 168667 5683                                                         |
| 241 | oxidoreductase activity,<br>acting on paired donors, with<br>incorporation or reduction of<br>molecular oxygen, reduced<br>flavin or flavoprotein as one<br>donor, and incorporation of<br>one atom of oxygen | GO:0016712 | 0.001565 | 0.018521 | 1545 1543                                                                                          |
| 242 | integral component of<br>plasma membrane                                                                                                                                                                      | GO:0005887 | 0.001578 | 0.018601 | 91653 2208 4915 2702 3588 5795 59352 2838 2263 5799                                                |
| 243 | regulation of biological<br>quality                                                                                                                                                                           | GO:0065008 | 0.001599 | 0.018721 | 80223 1545 1021 112755 5581 2208 4915 89797 2702 127833 5795 5799 3984 11315 10788 5683            |
| 244 | regulation of cellular<br>localization                                                                                                                                                                        | GO:0060341 | 0.001601 | 0.018721 | 3782 5581 83593 375346 4915 112755 11315                                                           |

---

---

|     |                                                             |            |          |          |                                                                                                                                         |
|-----|-------------------------------------------------------------|------------|----------|----------|-----------------------------------------------------------------------------------------------------------------------------------------|
| 245 | cell cortex                                                 | GO:0005938 | 0.001676 | 0.01947  | 5829 2263 375346 11336                                                                                                                  |
| 246 | positive regulation of<br>mesenchymal cell<br>proliferation | GO:0002053 | 0.001678 | 0.01947  | 2263 5396                                                                                                                               |
| 247 | cation binding                                              | GO:0043169 | 0.001692 | 0.019552 | 89932 1545 1543 7716 5829 83593 5581 28316 7799 2208 389058 55657 3984 11315 5192 1297 127833 7553                                      |
| 248 | endothelium development                                     | GO:0003158 | 0.00173  | 0.019917 | 2702 168667 7716                                                                                                                        |
| 249 | cellular biosynthetic process                               | GO:0044249 | 0.001772 | 0.020246 | 5396 7799 1893 80222 1543 7716 1371 7553 2263 586 1284 10643 1545 11315 57491 2120 64983 389058 55657 2005 9435 168667 22887            |
| 250 | cellular nitrogen compound<br>biosynthetic process          | GO:0044271 | 0.001773 | 0.020246 | 2120 7799 80222 5396 1545 7716 64983 10643 1371 1284 55657 389058 2005 7553 2263 11315 168667 57491 22887 1893                          |
| 251 | ventricular septum<br>morphogenesis                         | GO:0060412 | 0.001796 | 0.020346 | 2263 2702                                                                                                                               |
| 252 | positive regulation of<br>monooxygenase activity            | GO:0032770 | 0.001796 | 0.020346 | 2208 11315                                                                                                                              |
| 253 | kinase binding                                              | GO:0019900 | 0.001824 | 0.020589 | 5829 4915 112755 5795 11315 23328                                                                                                       |
| 254 | regulation of secretion by<br>cell                          | GO:1903530 | 0.0019   | 0.021359 | 80223 5581 127833 4915 112755 2702                                                                                                      |
| 255 | response to arsenic-<br>containing substance                | GO:0046685 | 0.001917 | 0.02147  | 1371 1543                                                                                                                               |
| 256 | nitrogen compound<br>metabolic process                      | GO:0006807 | 0.001957 | 0.02183  | 5396 7799 1893 80222 1543 7716 51343 1371 7553 2263 5683 586 1284 10643 1545 11315 57491 2120 64983 389058 55657 2005 9435 168667 22887 |
| 257 | positive regulation of<br>cellular component<br>biogenesis  | GO:0044089 | 0.001981 | 0.022016 | 3984 5795 10788 4915 5581                                                                                                               |
| 258 | smoothened signaling<br>pathway                             | GO:0007224 | 0.002006 | 0.022123 | 91653 5396 2263                                                                                                                         |

---

---

|     |                                                        |            |          |          |                                                                                                                      |
|-----|--------------------------------------------------------|------------|----------|----------|----------------------------------------------------------------------------------------------------------------------|
| 259 | positive regulation of synaptic transmission           | GO:0050806 | 0.002006 | 0.022123 | 4915 112755 5581                                                                                                     |
| 260 | intrinsic component of plasma membrane                 | GO:0031226 | 0.002049 | 0.022486 | 91653 2208 4915 2702 3588 5795 59352 2838 2263 5799                                                                  |
| 261 | axon terminus                                          | GO:0043679 | 0.002054 | 0.022486 | 4915 5799 57465                                                                                                      |
| 262 | plasma membrane                                        | GO:0005886 | 0.002078 | 0.022658 | 3782 91653 5581 5829 6461 4915 11252 6506 2702 2208 5795 5799 59352 2838 2263 11315 112755 3588 28316 127833         |
| 263 | MAPK cascade                                           | GO:0000165 | 0.002096 | 0.022658 | 5581 4915 23328 5795 2263 168667 5683                                                                                |
| 264 | catalytic activity                                     | GO:0003824 | 0.002097 | 0.022658 | 56992 7799 196385 1371 80222 1543 5581 89797 89932 2263 5683 586 2582 1545 11315 1021 4915 51059 5795 3984 9435 5799 |
| 265 | intracellular non-membrane-bounded organelle           | GO:0043232 | 0.002109 | 0.022658 | 64518 1021 5396 7716 5829 83593 56992 5581 11252 64983 112755 2120 196385 11315 10788 54535 5683                     |
| 266 | non-membrane-bounded organelle                         | GO:0043228 | 0.002109 | 0.022658 | 64518 1021 5396 7716 5829 83593 56992 5581 11252 64983 112755 2120 196385 11315 10788 54535 5683                     |
| 267 | positive regulation of canonical Wnt signaling pathway | GO:0090263 | 0.002153 | 0.022964 | 2263 59352 5683                                                                                                      |
| 268 | amine metabolic process                                | GO:0009308 | 0.002153 | 0.022964 | 11315 1543 5683                                                                                                      |
| 269 | multicellular organism aging                           | GO:0010259 | 0.002171 | 0.02307  | 7799 6506                                                                                                            |
| 270 | SNARE binding                                          | GO:0000149 | 0.002203 | 0.023248 | 127833 112755 11336                                                                                                  |
| 271 | regulation of cellular component organization          | GO:0051128 | 0.002203 | 0.023248 | 3782 4915 5396 5581 127833 51343 11252 112755 5795 3984 11315 10788                                                  |
| 272 | regulation of protein kinase B signaling               | GO:0051896 | 0.002255 | 0.023702 | 5795 4915 11315                                                                                                      |
| 273 | positive regulation of angiogenesis                    | GO:0045766 | 0.002307 | 0.024162 | 1545 1893 23328                                                                                                      |
| 274 | protein modification by small protein conjugation      | GO:0032446 | 0.002384 | 0.024884 | 5581 83593 51343 23328 3984 11315 5683                                                                               |

---

---

|     |                                                           |            |          |          |                                                                                                                                                 |
|-----|-----------------------------------------------------------|------------|----------|----------|-------------------------------------------------------------------------------------------------------------------------------------------------|
| 275 | vesicle-mediated transport                                | GO:0016192 | 0.002434 | 0.025282 | 80223 5581 127833 56992 11252 112755 11336 3984 1893                                                                                            |
| 276 | regulation of cell aging                                  | GO:0090342 | 0.00244  | 0.025282 | 51343 1021                                                                                                                                      |
| 277 | regulation of reproductive process                        | GO:2000241 | 0.002467 | 0.025381 | 2263 51343 64518                                                                                                                                |
| 278 | response to hydrogen peroxide                             | GO:0042542 | 0.002467 | 0.025381 | 10068 1545 11315                                                                                                                                |
| 279 | regulation of intracellular signal transduction           | GO:1902531 | 0.002475 | 0.025381 | 1545 5581 4915 23328 5795 100271715 2263 11315 168667 1893                                                                                      |
| 280 | nucleus                                                   | GO:0005634 | 0.0025   | 0.025541 | 64518 5396 83593 7799 5581 5829 51343 89797 7553 2263 100526772 5683 10643 112755 389058 11315 2120 1021 7716 11252 55657 2005 3984 54535 22887 |
| 281 | synaptic vesicle                                          | GO:0008021 | 0.002578 | 0.026174 | 127833 5799 112755                                                                                                                              |
| 282 | regulation of mesenchymal cell proliferation              | GO:0010464 | 0.00258  | 0.026174 | 2263 5396                                                                                                                                       |
| 283 | positive regulation of cellular protein metabolic process | GO:0032270 | 0.002627 | 0.02656  | 4915 5581 83593 51343 23328 2263 11315 168667 5683                                                                                              |
| 284 | signal transduction by protein phosphorylation            | GO:0023014 | 0.002636 | 0.026562 | 5581 4915 23328 5795 2263 168667 5683                                                                                                           |
| 285 | regulation of MAPK cascade                                | GO:0043408 | 0.002651 | 0.026624 | 5581 4915 23328 5795 2263 168667                                                                                                                |
| 286 | regulated exocytosis                                      | GO:0045055 | 0.002661 | 0.026631 | 127833 80223 112755 1893                                                                                                                        |
| 287 | macromolecular complex                                    | GO:0032991 | 0.002684 | 0.02677  | 1284 10788 1021 112755 5829 56992 51343 64983 23328 3588 1299 5799 11336 196385 11315 2702 1297 5683 4915                                       |
| 288 | response to iron ion                                      | GO:0010039 | 0.002723 | 0.026958 | 1371 1543                                                                                                                                       |
| 289 | porphyrin-containing compound metabolic process           | GO:0006778 | 0.002723 | 0.026958 | 1371 1543                                                                                                                                       |
| 290 | establishment of protein localization                     | GO:0045184 | 0.002745 | 0.026958 | 3782 80223 112755 5581 375346 2702 11336 11315 5192 54535 5799                                                                                  |

---

---

|     |                                                        |            |          |          |                                                                                               |
|-----|--------------------------------------------------------|------------|----------|----------|-----------------------------------------------------------------------------------------------|
| 291 | neuron projection terminus                             | GO:0044306 | 0.00275  | 0.026958 | 4915 5799 57465                                                                               |
| 292 | neuron-neuron synaptic transmission                    | GO:0007270 | 0.00275  | 0.026958 | 11315 4915 5581                                                                               |
| 293 | cytoskeleton                                           | GO:0005856 | 0.002809 | 0.027443 | 64518 1021 5581 5829 83593 56992 11252 112755 196385 10788 54535                              |
| 294 | positive regulation of developmental process           | GO:0051094 | 0.002818 | 0.027443 | 91653 1545 127833 4915 23328 3984 2263 1893                                                   |
| 295 | positive regulation of cellular component organization | GO:0051130 | 0.002863 | 0.027773 | 3782 5581 127833 4915 5795 3984 11315 10788                                                   |
| 296 | T cell migration                                       | GO:0072678 | 0.002871 | 0.027773 | 1893 2838                                                                                     |
| 297 | regulation of secretion                                | GO:0051046 | 0.002896 | 0.027928 | 80223 5581 127833 4915 112755 2702                                                            |
| 298 | leading edge membrane                                  | GO:0031256 | 0.002928 | 0.028141 | 5795 11252 6506                                                                               |
| 299 | endoplasmic reticulum part                             | GO:0044432 | 0.002985 | 0.028595 | 1284 1545 1543 387914 375346 1299 1297 5799                                                   |
| 300 | organelle organization                                 | GO:0006996 | 0.003005 | 0.028693 | 3782 91653 80222 112755 5581 127833 56992 51343 11252 64983 5192 7799 2005 3984 11315 10788   |
| 301 | regulation of GTPase activity                          | GO:0043087 | 0.003025 | 0.028763 | 57465 4915 100271715 2263 10788 5799                                                          |
| 302 | positive regulation of vasculature development         | GO:1904018 | 0.003051 | 0.028763 | 1545 1893 23328                                                                               |
| 303 | response to other organism                             | GO:0051707 | 0.003052 | 0.028763 | 1021 1543 5581 3588 10068 23328 5683                                                          |
| 304 | response to external biotic stimulus                   | GO:0043207 | 0.003052 | 0.028763 | 1021 1543 5581 3588 10068 23328 5683                                                          |
| 305 | camera-type eye development                            | GO:0043010 | 0.003179 | 0.029862 | 1545 51343 1543 4915                                                                          |
| 306 | positive regulation of MAPK cascade                    | GO:0043410 | 0.003195 | 0.029915 | 2263 4915 5581 168667 23328                                                                   |
| 307 | regulation of macromolecule                            | GO:0010556 | 0.003256 | 0.030312 | 2120 1545 57491 5396 7716 2208 10643 7799 389058 55657 2005 7553 2263 11315 168667 22887 1893 |

---

---

|     |                                                                    |            |          |          |                                                                                         |
|-----|--------------------------------------------------------------------|------------|----------|----------|-----------------------------------------------------------------------------------------|
|     | biosynthetic process                                               |            |          |          |                                                                                         |
| 308 | cytoplasmic region                                                 | GO:0099568 | 0.003258 | 0.030312 | 5829 2263 375346 11336                                                                  |
| 309 | transcription, DNA-templated                                       | GO:0006351 | 0.003388 | 0.031422 | 2120 1284 57491 5396 1545 7716 7799 389058 55657 2005 7553 2263 11315 168667 22887 1893 |
| 310 | organic acid metabolic process                                     | GO:0006082 | 0.003416 | 0.031484 | 586 1545 1543 5581 80222 11315 5683                                                     |
| 311 | ATP binding                                                        | GO:0005524 | 0.003417 | 0.031484 | 80222 1021 5581 56992 4915 89797 3984 196385 2263                                       |
| 312 | exocytic vesicle                                                   | GO:0070382 | 0.003439 | 0.031591 | 127833 5799 112755                                                                      |
| 313 | positive regulation of cell-matrix adhesion                        | GO:0001954 | 0.003497 | 0.031924 | 5795 1021                                                                               |
| 314 | nucleic acid-templated transcription                               | GO:0097659 | 0.003518 | 0.032016 | 2120 1284 57491 5396 1545 7716 7799 389058 55657 2005 7553 2263 11315 168667 22887 1893 |
| 315 | neuron development                                                 | GO:0048666 | 0.003558 | 0.032274 | 91653 5396 57465 127833 4915 3984 2263                                                  |
| 316 | immune response-activating cell surface receptor signaling pathway | GO:0002429 | 0.003588 | 0.032447 | 3984 5795 5683 5581                                                                     |
| 317 | regulation of protein localization                                 | GO:0032880 | 0.003599 | 0.032447 | 3782 80223 5581 83593 375346 2702 11315                                                 |
| 318 | cytoskeletal part                                                  | GO:0044430 | 0.003621 | 0.03254  | 64518 1021 5829 83593 56992 112755 196385 10788 54535                                   |
| 319 | growth cone                                                        | GO:0030426 | 0.003644 | 0.032547 | 3984 91653 4915                                                                         |
| 320 | microtubule associated complex                                     | GO:0005875 | 0.003644 | 0.032547 | 196385 5829 56992                                                                       |
| 321 | response to biotic stimulus                                        | GO:0009607 | 0.003768 | 0.033342 | 1021 1543 5581 3588 10068 23328 5683                                                    |
| 322 | limb morphogenesis                                                 | GO:0035108 | 0.003784 | 0.033342 | 2263 5396 2702                                                                          |
| 323 | protein kinase B signaling                                         | GO:0043491 | 0.003784 | 0.033342 | 5795 4915 11315                                                                         |
| 324 | appendage morphogenesis                                            | GO:0035107 | 0.003784 | 0.033342 | 2263 5396 2702                                                                          |

---

---

|     |                                                             |            |          |          |                                                                                                    |
|-----|-------------------------------------------------------------|------------|----------|----------|----------------------------------------------------------------------------------------------------|
| 325 | neuron projection                                           | GO:0043005 | 0.00379  | 0.033342 | 91653 57465 4915 6506 3984 11315 5799                                                              |
| 326 | mesenchymal cell proliferation                              | GO:0010463 | 0.003832 | 0.033611 | 2263 5396                                                                                          |
| 327 | positive regulation of protein metabolic process            | GO:0051247 | 0.003885 | 0.033961 | 4915 5581 83593 51343 23328 2263 11315 168667 5683                                                 |
| 328 | cell-substrate adhesion                                     | GO:0031589 | 0.003895 | 0.033961 | 5829 5795 1021 5581                                                                                |
| 329 | site of polarized growth                                    | GO:0030427 | 0.004001 | 0.034503 | 3984 91653 4915                                                                                    |
| 330 | glutamate secretion                                         | GO:0014047 | 0.004005 | 0.034503 | 4915 6506                                                                                          |
| 331 | regulation of endocrine process                             | GO:0044060 | 0.004005 | 0.034503 | 80223 2702                                                                                         |
| 332 | negative regulation of GTPase activity                      | GO:0034260 | 0.004005 | 0.034503 | 10788 5799                                                                                         |
| 333 | adenyl ribonucleotide binding                               | GO:0032559 | 0.004022 | 0.034552 | 80222 1021 5581 56992 4915 89797 3984 196385 2263                                                  |
| 334 | regulation of transcription from RNA polymerase II promoter | GO:0006357 | 0.004054 | 0.034718 | 2120 57491 5396 7716 2005 2263 11315 168667 22887 1893                                             |
| 335 | extracellular region                                        | GO:0005576 | 0.004103 | 0.034941 | 1284 2582 64518 2208 10068 11252 89797 89932 3588 5795 1299 2263 11315 10788 168667 1297 5683 1893 |
| 336 | structural molecule activity                                | GO:0005198 | 0.004104 | 0.034941 | 1284 64983 23328 1371 1299 1297                                                                    |
| 337 | organ morphogenesis                                         | GO:0009887 | 0.004148 | 0.035129 | 5396 4915 2702 389058 2263 1297 5683                                                               |
| 338 | endothelial cell migration                                  | GO:0043542 | 0.00415  | 0.035129 | 1545 168667 23328                                                                                  |
| 339 | regulation of cell proliferation                            | GO:0042127 | 0.004182 | 0.035257 | 1545 1021 5396 83593 51343 5795 2263 4915 1893                                                     |
| 340 | adenyl nucleotide binding                                   | GO:0030554 | 0.004218 | 0.035257 | 80222 1021 5581 56992 4915 89797 3984 196385 2263                                                  |
| 341 | regulation of actin filament-based process                  | GO:0032970 | 0.00422  | 0.035257 | 3984 5581 10788 2702                                                                               |

---

---

|     |                                                                       |            |          |          |                                                                                                               |
|-----|-----------------------------------------------------------------------|------------|----------|----------|---------------------------------------------------------------------------------------------------------------|
| 342 | positive regulation of Wnt signaling pathway                          | GO:0030177 | 0.004225 | 0.035257 | 2263 59352 5683                                                                                               |
| 343 | response to transition metal nanoparticle                             | GO:1990267 | 0.004225 | 0.035257 | 1371 11315 1543                                                                                               |
| 344 | cell surface                                                          | GO:0009986 | 0.004299 | 0.035764 | 2208 4915 6506 5795 2263 10788                                                                                |
| 345 | response to inorganic substance                                       | GO:0010035 | 0.004315 | 0.035774 | 1371 10068 1545 11315 1543                                                                                    |
| 346 | hydrogen peroxide metabolic process                                   | GO:0042743 | 0.004361 | 0.035774 | 11315 1543                                                                                                    |
| 347 | intrinsic apoptotic signaling pathway in response to oxidative stress | GO:0008631 | 0.004361 | 0.035774 | 11315 1545                                                                                                    |
| 348 | receptor regulator activity                                           | GO:0030545 | 0.004361 | 0.035774 | 10068 5581                                                                                                    |
| 349 | positive regulation of receptor activity                              | GO:2000273 | 0.004361 | 0.035774 | 11315 5581                                                                                                    |
| 350 | cellular macromolecule biosynthetic process                           | GO:0034645 | 0.004447 | 0.036358 | 2120 1284 80222 5396 1545 7716 64983 10643 7799 57491 55657 389058 2005 7553 2263 11315 168667 22887 1893     |
| 351 | positive regulation of developmental growth                           | GO:0048639 | 0.004457 | 0.036358 | 3984 2263 127833                                                                                              |
| 352 | protein metabolic process                                             | GO:0019538 | 0.004481 | 0.03645  | 89932 80222 1021 5581 83593 51343 64983 23328 7799 5795 4915 5799 10643 2005 3984 2263 11315 168667 5683 1893 |
| 353 | ruffle                                                                | GO:0001726 | 0.004536 | 0.03666  | 1021 5795 11252                                                                                               |
| 354 | embryonic cranial skeleton morphogenesis                              | GO:0048701 | 0.004545 | 0.03666  | 2263 5396                                                                                                     |
| 355 | positive regulation of oxidoreductase activity                        | GO:0051353 | 0.004545 | 0.03666  | 2208 11315                                                                                                    |
| 356 | ameboidal-type cell                                                   | GO:0001667 | 0.004562 | 0.036694 | 1545 5581 168667 23328                                                                                        |

---



---

|     |                                                                    |            |          |          |                                                                                         |
|-----|--------------------------------------------------------------------|------------|----------|----------|-----------------------------------------------------------------------------------------|
|     | migration                                                          |            |          |          |                                                                                         |
| 357 | regulation of protein transport                                    | GO:0051223 | 0.004709 | 0.037774 | 3782 80223 5581 375346 2702 11315                                                       |
| 358 | glandular epithelial cell differentiation                          | GO:0002067 | 0.004732 | 0.037854 | 2263 1021                                                                               |
| 359 | cellular response to stress                                        | GO:0033554 | 0.004765 | 0.038014 | 91653 1545 1021 5396 5581 5829 10068 51343 23328 11315                                  |
| 360 | positive regulation of macromolecule metabolic process             | GO:0010604 | 0.004812 | 0.038285 | 2120 4915 1021 5396 5581 2208 83593 51343 23328 2263 11315 168667 5683                  |
| 361 | RNA biosynthetic process                                           | GO:0032774 | 0.004825 | 0.038286 | 2120 1284 57491 5396 1545 7716 7799 389058 55657 2005 7553 2263 11315 168667 22887 1893 |
| 362 | small molecule catabolic process                                   | GO:0044282 | 0.004869 | 0.038531 | 586 11315 2582 1543                                                                     |
| 363 | protein phosphorylation                                            | GO:0006468 | 0.004911 | 0.038737 | 1021 5581 4915 23328 5795 3984 2263 11315 168667 5683                                   |
| 364 | response to lipopolysaccharide                                     | GO:0032496 | 0.004922 | 0.038737 | 10068 5581 1543 23328                                                                   |
| 365 | protein modification by small protein conjugation or removal       | GO:0070647 | 0.004968 | 0.038919 | 5581 83593 51343 23328 3984 11315 5683                                                  |
| 366 | cellular protein localization                                      | GO:0034613 | 0.004972 | 0.038919 | 3782 83593 375346 11252 5192 11336 11315 112755 54535                                   |
| 367 | immune response-regulating cell surface receptor signaling pathway | GO:0002768 | 0.005082 | 0.039675 | 3984 5795 5683 5581                                                                     |
| 368 | cardiac septum morphogenesis                                       | GO:0060411 | 0.005116 | 0.039836 | 2263 2702                                                                               |
| 369 | cellular macromolecule localization                                | GO:0070727 | 0.005139 | 0.039904 | 3782 83593 375346 11252 5192 11336 11315 112755 54535                                   |

---

---

|     |                                               |            |          |          |                                                                                               |
|-----|-----------------------------------------------|------------|----------|----------|-----------------------------------------------------------------------------------------------|
| 370 | regulation of neurotransmitter secretion      | GO:0046928 | 0.005314 | 0.040827 | 4915 112755                                                                                   |
| 371 | oxygen binding                                | GO:0019825 | 0.005314 | 0.040827 | 1545 1543                                                                                     |
| 372 | lipopolysaccharide-mediated signaling pathway | GO:0031663 | 0.005314 | 0.040827 | 5581 23328                                                                                    |
| 373 | eye development                               | GO:0001654 | 0.005357 | 0.040957 | 1545 51343 1543 4915                                                                          |
| 374 | transmembrane transport                       | GO:0055085 | 0.005363 | 0.040957 | 3782 5581 375346 6506 2702 148808 11315 5192                                                  |
| 375 | regulation of epithelial cell migration       | GO:0010632 | 0.005373 | 0.040957 | 5581 168667 23328                                                                             |
| 376 | artery morphogenesis                          | GO:0048844 | 0.005515 | 0.041873 | 5396 2702                                                                                     |
| 377 | regulation of transcription, DNA-templated    | GO:0006355 | 0.005541 | 0.041873 | 2120 1545 57491 5396 7716 7799 389058 55657 2005 7553 2263 11315 168667 22887 1893            |
| 378 | appendage development                         | GO:0048736 | 0.00555  | 0.041873 | 2263 5396 2702                                                                                |
| 379 | limb development                              | GO:0060173 | 0.00555  | 0.041873 | 2263 5396 2702                                                                                |
| 380 | response to molecule of bacterial origin      | GO:0002237 | 0.005699 | 0.042812 | 10068 5581 1543 23328                                                                         |
| 381 | positive regulation of phospholipase activity | GO:0010518 | 0.005719 | 0.042812 | 2263 5581                                                                                     |
| 382 | arachidonic acid metabolic process            | GO:0019369 | 0.005719 | 0.042812 | 1545 1543                                                                                     |
| 383 | neuron projection morphogenesis               | GO:0048812 | 0.005736 | 0.042826 | 3984 91653 4915 127833 2263                                                                   |
| 384 | protein kinase binding                        | GO:0019901 | 0.005779 | 0.043041 | 5829 5795 112755 4915 23328                                                                   |
| 385 | regulation of biosynthetic process            | GO:0009889 | 0.005801 | 0.043092 | 2120 1545 57491 5396 7716 2208 10643 7799 389058 55657 2005 7553 2263 11315 168667 22887 1893 |
| 386 | regulation of nucleic acid-                   | GO:1903506 | 0.005821 | 0.043135 | 2120 1545 57491 5396 7716 7799 389058 55657 2005 7553 2263 11315 168667 22887 1893            |

---

---

|     |                                                                           |            |          |          |                                                                                               |
|-----|---------------------------------------------------------------------------|------------|----------|----------|-----------------------------------------------------------------------------------------------|
|     | templated transcription                                                   |            |          |          |                                                                                               |
| 387 | inner ear development                                                     | GO:0048839 | 0.005916 | 0.043645 | 2263 168667 5396                                                                              |
| 388 | regulation of cellular<br>macromolecule biosynthetic<br>process           | GO:2000112 | 0.005921 | 0.043645 | 2120 1545 57491 5396 7716 10643 7799 389058 55657 2005 7553 2263 11315 168667 22887 1893      |
| 389 | epithelial cell proliferation                                             | GO:0050673 | 0.005935 | 0.043645 | 2263 1021 168667 1893                                                                         |
| 390 | behavior                                                                  | GO:0007610 | 0.006001 | 0.044017 | 11315 6506 4915 89797 5581                                                                    |
| 391 | plasma membrane part                                                      | GO:0044459 | 0.00603  | 0.044116 | 91653 2208 4915 11252 6506 2702 3588 5795 59352 2838 2263 5799                                |
| 392 | regulation of RNA<br>biosynthetic process                                 | GO:2001141 | 0.006097 | 0.044441 | 2120 1545 57491 5396 7716 7799 389058 55657 2005 7553 2263 11315 168667 22887 1893            |
| 393 | regulation of cell-substrate<br>adhesion                                  | GO:0010810 | 0.006105 | 0.044441 | 5795 1021 5581                                                                                |
| 394 | ventricular septum<br>development                                         | GO:0003281 | 0.006138 | 0.044575 | 2263 2702                                                                                     |
| 395 | generation of neurons                                                     | GO:0048699 | 0.00622  | 0.045053 | 91653 1021 5396 57465 127833 4915 3984 2263                                                   |
| 396 | positive regulation of<br>cytoskeleton organization                       | GO:0051495 | 0.006296 | 0.045496 | 3984 10788 5581                                                                               |
| 397 | tetrapyrrole metabolic<br>process                                         | GO:0033013 | 0.006353 | 0.045791 | 1371 1543                                                                                     |
| 398 | regulation of ossification                                                | GO:0030278 | 0.006394 | 0.04597  | 2263 1021 1893                                                                                |
| 399 | regulation of nitrogen<br>compound metabolic process                      | GO:0051171 | 0.006546 | 0.046783 | 2120 1545 57491 5396 7716 10643 7799 389058 55657 22887 2005 7553 2263 11315 168667 5683 1893 |
| 400 | insulin secretion involved in<br>cellular response to glucose<br>stimulus | GO:0035773 | 0.006571 | 0.046783 | 5799 5581                                                                                     |
| 401 | cranial skeletal system                                                   | GO:1904888 | 0.006571 | 0.046783 | 2263 5396                                                                                     |

---

---

|     |                                                  |            |          |          |                                                                                              |
|-----|--------------------------------------------------|------------|----------|----------|----------------------------------------------------------------------------------------------|
|     | development                                      |            |          |          |                                                                                              |
| 402 | cartilage development                            | GO:0051216 | 0.006591 | 0.04681  | 100526772 1297 5396                                                                          |
| 403 | positive regulation of protein ubiquitination    | GO:0031398 | 0.006691 | 0.047343 | 83593 51343 5683                                                                             |
| 404 | heterocycle biosynthetic process                 | GO:0018130 | 0.006698 | 0.047343 | 2120 1284 57491 5396 1545 7716 7799 1371 389058 55657 2005 7553 2263 11315 168667 22887 1893 |
| 405 | regulation of protein complex assembly           | GO:0043254 | 0.006748 | 0.047577 | 11315 10788 112755 5581                                                                      |
| 406 | secondary metabolic process                      | GO:0019748 | 0.006792 | 0.047661 | 1545 1543                                                                                    |
| 407 | regulation of calcium ion-dependent exocytosis   | GO:0017158 | 0.006792 | 0.047661 | 127833 112755                                                                                |
| 408 | developmental growth                             | GO:0048589 | 0.006849 | 0.04794  | 3984 2263 100526772 6506 127833                                                              |
| 409 | regulation of transmembrane transporter activity | GO:0022898 | 0.006893 | 0.04807  | 375346 11315 5581                                                                            |
| 410 | aromatic compound biosynthetic process           | GO:0019438 | 0.0069   | 0.04807  | 2120 1284 57491 5396 1545 7716 7799 1371 389058 55657 2005 7553 2263 11315 168667 22887 1893 |
| 411 | protein export from nucleus                      | GO:0006611 | 0.007017 | 0.048652 | 11315 54535                                                                                  |
| 412 | establishment of localization in cell            | GO:0051649 | 0.007126 | 0.04929  | 3782 5581 127833 375346 4915 5192 11315 112755 54535 5799                                    |
| 413 | forebrain development                            | GO:0030900 | 0.007146 | 0.049294 | 2263 4915 1021 6506                                                                          |
| 414 | Fc receptor signaling pathway                    | GO:0038093 | 0.007204 | 0.049294 | 3984 5683 5581                                                                               |
| 415 | locomotory behavior                              | GO:0007626 | 0.007204 | 0.049294 | 11315 89797 5581                                                                             |
| 416 | outflow tract morphogenesis                      | GO:0003151 | 0.007245 | 0.049294 | 2263 2702                                                                                    |
| 417 | exocytic vesicle membrane                        | GO:0099501 | 0.007245 | 0.049294 | 127833 5799                                                                                  |
| 418 | regulation of                                    | GO:0032768 | 0.007245 | 0.049294 | 2208 11315                                                                                   |

---

---

|     |                                                  |            |          |          |                            |
|-----|--------------------------------------------------|------------|----------|----------|----------------------------|
|     | monooxygenase activity                           |            |          |          |                            |
| 419 | synaptic vesicle membrane                        | GO:0030672 | 0.007245 | 0.049294 | 127833 5799                |
| 420 | positive regulation of<br>organelle organization | GO:0010638 | 0.007354 | 0.049919 | 3782 3984 11315 10788 5581 |

---

**Table S4.** The relationship between methylation and expression

|    | Probe      | Chromosome | Gene_Symbol | The relationship between probe and expression | Correlation coefficient |
|----|------------|------------|-------------|-----------------------------------------------|-------------------------|
| 1  | cg00976097 | chr5       | AHRR        | Positive                                      | 0.22                    |
| 2  | cg05575921 | chr5       | AHRR        | Negative                                      | -0.13                   |
| 3  | cg26076054 | chr5       | AHRR        | Positive                                      | 0.21                    |
| 4  | cg13990746 | chr1       | ANKRD45     | Negative                                      | -0.16                   |
| 5  | cg15680620 | chr1       | ANKRD45     | Negative                                      | -0.13                   |
| 6  | cg09799983 | chr2       | CYP1B1      | Negative                                      | -0.11                   |
| 7  | cg11751707 | chr2       | CYP1B1      | Positive                                      | 0.00                    |
| 8  | cg09194449 | chr7       | PTPRN2      | Negative                                      | -0.08                   |
| 9  | cg10650290 | chr7       | PTPRN2      | Positive                                      | 0.14                    |
| 10 | cg14419740 | chr7       | PTPRN2      | Negative                                      | -0.14                   |
| 11 | cg07813142 | chr2       | SP5         | Negative                                      | -0.07                   |
| 12 | cg24772753 | chr2       | SP5         | Negative                                      | -0.05                   |
| 13 | cg05752786 | chr1       | SYT2        | Positive                                      | 0.01                    |
| 14 | cg16315376 | chr1       | SYT2        | Negative                                      | -0.01                   |
| 15 | cg26582784 | chr7       | AC002454.1  | Positive                                      | 0.03                    |
| 16 | cg00993400 | chr1       | AL672294.1  | Positive                                      | 0.02                    |
| 17 | cg07325233 | chr21      | AP000295.9  | Positive                                      | 0.16                    |
| 18 | cg02826525 | chr2       | ARHGEF33    | Negative                                      | -0.10                   |
| 19 | cg21500300 | chr12      | BCAT1       | Negative                                      | -0.13                   |
| 20 | cg10413224 | chr7       | BMPER       | Positive                                      | 0.13                    |
| 21 | cg02498206 | chr3       | BOC         | Positive                                      | 0.08                    |
| 22 | cg25192619 | chr6       | CCDC167     | Negative                                      | -0.07                   |
| 23 | cg00688979 | chr6       | CCHCR1      | Positive                                      | 0.07                    |
| 24 | cg02050426 | chr18      | CDH20       | Positive                                      | 0.06                    |
| 25 | cg17373442 | chr3       | CHST2       | Negative                                      | -0.06                   |
| 26 | cg04616529 | chr16      | CLEC16A     | Negative                                      | -0.09                   |
| 27 | cg10076730 | chr13      | COL4A2      | Positive                                      | 0.00                    |
| 28 | cg15922705 | chr6       | COL9A1      | Positive                                      | 0.21                    |
| 29 | cg08374798 | chr20      | COL9A3      | Positive                                      | 0.03                    |
| 30 | cg19859270 | chr3       | CPOX        | Negative                                      | -0.10                   |
| 31 | cg00370022 | chr15      | CYP1A1      | Negative                                      | -0.14                   |
| 32 | cg17211612 | chr12      | DNAH10      | Positive                                      | 0.01                    |
| 33 | cg05951221 | chr2       | ECEL1P1     | Negative                                      | -0.05                   |
| 34 | cg26799398 | chr1       | ECM1        | Negative                                      | -0.32                   |
| 35 | cg21012061 | chr1       | ELK4        | Negative                                      | -0.12                   |
| 36 | cg24279017 | chr12      | ETV6        | Positive                                      | 0.07                    |
| 37 | cg16322479 | chr5       | EXOC3       | Negative                                      | -0.05                   |
| 38 | cg26005485 | chr8       | FAM135B     | Positive                                      | 0.07                    |
| 39 | cg01637537 | chr22      | FAM83F      | Positive                                      | 0.07                    |
| 40 | cg12387247 | chr19      | FCER2       | Negative                                      | -0.03                   |

|    |            |       |               |          |       |
|----|------------|-------|---------------|----------|-------|
| 41 | cg05033369 | chr1  | FCRLA         | Positive | 0.01  |
| 42 | cg01049916 | chr10 | FGFR2         | Positive | 0.32  |
| 43 | cg09278187 | chr1  | FOXJ3         | Negative | -0.03 |
| 44 | cg13563863 | chr19 | FZR1          | Negative | -0.05 |
| 45 | cg08733957 | chr1  | GALE          | Negative | -0.06 |
| 46 | cg08894131 | chr1  | GJA5          | Negative | -0.13 |
| 47 | cg03078488 | chr7  | IGF2BP3       | Negative | -0.10 |
| 48 | cg20538211 | chr4  | IGFBP7-AS1    | Negative | -0.07 |
| 49 | cg26972614 | chr11 | IL18BP        | Negative | -0.03 |
| 50 | cg02387679 | chr5  | IQGAP2        | Negative | -0.21 |
| 51 | cg18713316 | chr1  | KCNN3         | Negative | -0.01 |
| 52 | cg00702638 | chr3  | KIAA1143      | Negative | -0.05 |
| 53 | cg03985801 | chr1  | LGR6          | Positive | 0.17  |
| 54 | cg00334821 | chr7  | LIMK1         | Negative | 0.00  |
| 55 | cg03277049 | chr3  | LINC00886     | Positive | 0.00  |
| 56 | cg16377959 | chr5  | LINC01019     | Negative | -0.12 |
| 57 | cg10354195 | chr10 | LRRC27        | Positive | 0.08  |
| 58 | cg15513657 | chr14 | MEG3          | Positive | 0.06  |
| 59 | cg18001059 | chr7  | MRPL32        | Negative | 0.00  |
| 60 | cg24203542 | chr11 | NAV2          | Negative | -0.09 |
| 61 | cg13654445 | chr9  | NTRK2         | Positive | 0.11  |
| 62 | cg18919659 | chr22 | PACSIN2       | Negative | -0.08 |
| 63 | cg21885107 | chr14 | PAPLN         | Negative | -0.03 |
| 64 | cg10385390 | chr1  | PARK7         | Positive | 0.01  |
| 65 | cg14373988 | chr1  | PEX10         | Negative | -0.12 |
| 66 | cg03945895 | chr1  | PRDM2         | Positive | 0.00  |
| 67 | cg16884847 | chr2  | PRKCE         | Negative | -0.13 |
| 68 | cg11954332 | chr1  | PRRX1         | Positive | 0.09  |
| 69 | cg11545521 | chr11 | PTPRJ         | Negative | -0.11 |
| 70 | cg23854567 | chr12 | PXN           | Positive | 0.02  |
| 71 | cg16840978 | chr8  | RAB11FIP1     | Negative | -0.03 |
| 72 | cg15585555 | chr1  | RASSF5        | Negative | -0.23 |
| 73 | cg08008475 | chr13 | RNY1P1        | Positive | 0.18  |
| 74 | cg09370982 | chr16 | RP11-20I23.1  | Positive | 0.16  |
| 75 | cg20628376 | chr10 | RP11-351M16.3 | Negative | -0.13 |
| 76 | cg07709148 | chr8  | RP11-486M23.1 | Negative | -0.04 |
| 77 | cg14270346 | chr9  | RP11-613M10.9 | Negative | -0.05 |
| 78 | cg23501962 | chr11 | RP4-683L5.1   | Positive | 0.03  |
| 79 | cg23369748 | chr6  | SASH1         | Positive | 0.04  |
| 80 | cg15233380 | chr13 | SHISA2        | Positive | 0.25  |
| 81 | cg05787209 | chr16 | STX1B         | Negative | -0.14 |
| 82 | cg03642695 | chr17 | TEKT3         | Positive | 0.07  |
| 83 | cg04865290 | chr3  | TMEM110       | Negative | -0.13 |
| 84 | cg20439473 | chr17 | VEZF1         | Negative | -0.07 |

Note: The remaining 20 probes do not correspond to the gene.

**Table S5.** The expression of 95 genes corresponding to 105 probes (current-smoker VS never-smoker)

|    | Gene_Symbol | Chromosome | Start    | End      | Location | Type             |
|----|-------------|------------|----------|----------|----------|------------------|
| 1  | AC002454.1  | 7          | 92836483 | 92917187 | 7q21.2   | Over-expression  |
| 2  | AHRR        | 5          | 304176   | 438291   | 5p15.33  | Over-expression  |
| 3  | AL672294.1  | 1          | 2.49E+08 | 2.49E+08 | 1q44     | Under-expression |
| 4  | ANKRD45     | 1          | 1.74E+08 | 1.74E+08 | 1q25.1   | Under-expression |
| 5  | AP000295.9  | 21         | 33246774 | 33283212 | 21q22.11 | Under-expression |
| 6  | ARHGEF33    | 2          | 38889880 | 38975449 | 2p22.1   | Under-expression |
| 7  | BCAT1       | 12         | 24810022 | 24949459 | 12p12.1  | Under-expression |
| 8  | BMPER       | 7          | 33904911 | 34155872 | 7p14.3   | Under-expression |
| 9  | BOC         | 3          | 1.13E+08 | 1.13E+08 | 3q13.2   | Under-expression |
| 10 | CCDC167     | 6          | 37482920 | 37499922 | 6p21.2   | Over-expression  |
| 11 | CCHCR1      | 6          | 31142439 | 31158238 | 6p21.33  | Over-expression  |
| 12 | CDH20       | 18         | 61333582 | 61555773 | 18q21.33 | Under-expression |
| 13 | CDK6        | 7          | 92604921 | 92836594 | 7q21.2   | Over-expression  |
| 14 | CHST2       | 3          | 1.43E+08 | 1.43E+08 | 3q24     | Under-expression |
| 15 | CLEC16A     | 16         | 10944488 | 11182189 | 16p13.13 | Under-expression |
| 16 | COL4A2      | 13         | 1.1E+08  | 1.11E+08 | 13q34    | Over-expression  |
| 17 | COL9A1      | 6          | 70215061 | 70303083 | 6q13     | Under-expression |
| 18 | COL9A3      | 20         | 62816244 | 62841159 | 20q13.33 | Under-expression |
| 19 | CPOX        | 3          | 98521132 | 98593723 | 3q11.2   | Over-expression  |
| 20 | CYP1A1      | 15         | 74719542 | 74725610 | 15q24.1  | Over-expression  |
| 21 | CYP1B1      | 2          | 38066973 | 38109902 | 2p22.2   | Under-expression |
| 22 | CYP1B1-AS1  | 2          | 38073447 | 38231651 | 2p22.2   | Under-expression |
| 23 | DNAH10      | 12         | 1.24E+08 | 1.24E+08 | 12q24.31 | Under-expression |
| 24 | ECEL1P1     | 2          | 2.32E+08 | 2.32E+08 | 2q37.1   | Over-expression  |
| 25 | ECM1        | 1          | 1.51E+08 | 1.51E+08 | 1q21.2   | Under-expression |
| 26 | ELK4        | 1          | 2.06E+08 | 2.06E+08 | 1q32.1   | Under-expression |
| 27 | ETV6        | 12         | 11649854 | 11895402 | 12p13.2  | Over-expression  |
| 28 | EXOC3       | 5          | 443158   | 471937   | 5p15.33  | Over-expression  |
| 29 | EXOC3-AS1   | 5          | 441498   | 443160   | 5p15.33  | Over-expression  |
| 30 | FAM135B     | 8          | 1.38E+08 | 1.38E+08 | 8q24.23  | Under-expression |
| 31 | FAM83F      | 22         | 39994949 | 40043529 | 22q13.1  | Over-expression  |
| 32 | FCER2       | 19         | 7688758  | 7702146  | 19p13.2  | Under-expression |
| 33 | FCRLA       | 1          | 1.62E+08 | 1.62E+08 | 1q23.3   | Over-expression  |
| 34 | FGFR2       | 10         | 1.21E+08 | 1.22E+08 | 10q26.13 | Under-expression |
| 35 | FOXJ3       | 1          | 42176539 | 42335877 | 1p34.2   | Over-expression  |
| 36 | FZR1        | 19         | 3506273  | 3538330  | 19p13.3  | Over-expression  |
| 37 | GALE        | 1          | 23795599 | 23800804 | 1p36.11  | Under-expression |
| 38 | GJA5        | 1          | 1.48E+08 | 1.48E+08 | 1q21.2   | Under-expression |



---

|    |               |    |          |          |          |                  |
|----|---------------|----|----------|----------|----------|------------------|
| 39 | GPR15         | 3  | 98531899 | 98533150 | 3q11.2   | Over-expression  |
| 40 | IGF2BP3       | 7  | 23310209 | 23470467 | 7p15.3   | Over-expression  |
| 41 | IGFBP7-AS1    | 4  | 57109762 | 57205510 | 4q12     | Under-expression |
| 42 | IL10RB        | 21 | 33266358 | 33297234 | 21q22.11 | Under-expression |
| 43 | IL10RB-AS1    | 21 | 33263873 | 33266260 | 21q22.11 | Under-expression |
| 44 | IL18BP        | 11 | 71998541 | 72005715 | 11q13.4  | Over-expression  |
| 45 | IQGAP2        | 5  | 76403249 | 76708132 | 5q13.3   | Under-expression |
| 46 | KCNN3         | 1  | 1.55E+08 | 1.55E+08 | 1q21.3   | Under-expression |
| 47 | KIAA1143      | 3  | 44737661 | 44761662 | 3p21.31  | Under-expression |
| 48 | KIF15         | 3  | 44761717 | 44873376 | 3p21.31  | Over-expression  |
| 49 | LGR6          | 1  | 2.02E+08 | 2.02E+08 | 1q32.1   | Under-expression |
| 50 | LIMK1         | 7  | 74082933 | 74122525 | 7q11.23  | Under-expression |
| 51 | LINC00886     | 3  | 1.57E+08 | 1.57E+08 | 3q25.31  | Under-expression |
| 52 | LINC01019     | 5  | 3417152  | 3536094  | 5p15.33  | Over-expression  |
| 53 | LRRC27        | 10 | 1.32E+08 | 1.32E+08 | 10q26.3  | Under-expression |
| 54 | MEG3          | 14 | 1.01E+08 | 1.01E+08 | 14q32.2  | Under-expression |
| 55 | MFSD4         | 1  | 2.06E+08 | 2.06E+08 | 1q32.1   | Under-expression |
| 56 | MRPL32        | 7  | 42932200 | 42948958 | 7p14.1   | Under-expression |
| 57 | NAV2          | 11 | 19350724 | 20121598 | 11p15.1  | Over-expression  |
| 58 | NTRK2         | 9  | 84668551 | 85027070 | 9q21.33  | Under-expression |
| 59 | PACSIN2       | 22 | 42835412 | 43015145 | 22q13.2  | Under-expression |
| 60 | PAPLN         | 14 | 73237497 | 73274640 | 14q24.2  | Under-expression |
| 61 | PARK7         | 1  | 7954291  | 7985505  | 1p36.23  | Under-expression |
| 62 | PEX10         | 1  | 2403964  | 2413797  | 1p36.32  | Over-expression  |
| 63 | PRDM2         | 1  | 13700198 | 13825079 | 1p36.21  | Under-expression |
| 64 | PRKCE         | 2  | 45651345 | 46187990 | 2p21     | Under-expression |
| 65 | PRRX1         | 1  | 1.71E+08 | 1.71E+08 | 1q24.2   | Under-expression |
| 66 | PSMA2         | 7  | 42916857 | 42932223 | 7p14.1   | Under-expression |
| 67 | PTPRJ         | 11 | 47980558 | 48170841 | 11p11.2  | Under-expression |
| 68 | PTPRN2        | 7  | 1.58E+08 | 1.59E+08 | 7q36.3   | Under-expression |
| 69 | PXN           | 12 | 1.2E+08  | 1.2E+08  | 12q24.23 | Over-expression  |
| 70 | RAB11FIP1     | 8  | 37858618 | 37899467 | 8p11.23  | Under-expression |
| 71 | RASSF5        | 1  | 2.07E+08 | 2.07E+08 | 1q32.1   | Under-expression |
| 72 | RNY1P1        | 13 | 27402476 | 27402587 | 13q12.2  | Over-expression  |
| 73 | RP11-173C1.1  | 2  | 38959287 | 38960342 | 2p22.1   | Over-expression  |
| 74 | RP11-20123.1  | 16 | 2496032  | 2520218  | 16p13.3  | Over-expression  |
| 75 | RP11-351M16.3 | 10 | 28433008 | 28495813 | 10p12.1  | Over-expression  |
| 76 | RP11-486M23.1 | 8  | 29527312 | 29530323 | 8p12     | Over-expression  |
| 77 | RP11-613M10.9 | 9  | 37588413 | 38068687 | 9p13.2   | Under-expression |
| 78 | RP11-662I13.2 | 12 | 24949163 | 24960158 | 12p12.1  | Over-expression  |
| 79 | RP4-647C14.2  | 14 | 73242651 | 73245979 | 14q24.2  | Over-expression  |
| 80 | RP4-683L5.1   | 11 | 35419057 | 35421002 | 11p13    | Over-expression  |
| 81 | SASH1         | 6  | 1.48E+08 | 1.49E+08 | 6q24.3   | Under-expression |
| 82 | SHB           | 9  | 37919134 | 38069211 | 9p13.1   | Under-expression |

---

|    |                    |    |          |          |          |                  |
|----|--------------------|----|----------|----------|----------|------------------|
| 83 | SHISA2             | 13 | 26044597 | 26051031 | 13q12.13 | Under-expression |
| 84 | SLC1A2             | 11 | 35251206 | 35420063 | 11p13    | Under-expression |
| 85 | SP5                | 2  | 1.71E+08 | 1.71E+08 | 2q31.1   | Over-expression  |
| 86 | STX1B              | 16 | 30989256 | 31010628 | 16p11.2  | Under-expression |
| 87 | SYT2               | 1  | 2.03E+08 | 2.03E+08 | 1q32.1   | Under-expression |
| 88 | TARS2              | 1  | 1.5E+08  | 1.51E+08 | 1q21.2   | Over-expression  |
| 89 | TBC1D24            | 16 | 2475118  | 2505734  | 16p13.3  | Under-expression |
| 90 | TEKT3              | 17 | 15303811 | 15341641 | 17p12    | Under-expression |
| 91 | TMEM110            | 3  | 52836219 | 52897596 | 3p21.1   | Over-expression  |
| 92 | TMEM110-<br>MUSTN1 | 3  | 52833121 | 52897562 | 3p21.1   | Over-expression  |
| 93 | VEZF1              | 17 | 57971547 | 57988259 | 17q22    | Under-expression |
| 94 | ZNF692             | 1  | 2.49E+08 | 2.49E+08 | 1q44     | Over-expression  |
| 95 | ZNF7               | 8  | 1.45E+08 | 1.45E+08 | 8q24.3   | Over-expression  |

**Table S6.** Related references and related types of 95 genes

|    | Gene       | Related types           | Related references or materials                                                                                                                              |
|----|------------|-------------------------|--------------------------------------------------------------------------------------------------------------------------------------------------------------|
| 1  | AC002454.1 | cancer                  | <a href="https://www.genecards.org/cgi-bin/carddisp.pl?gene=LOC101927497">https://www.genecards.org/cgi-bin/carddisp.pl?gene=LOC101927497</a>                |
| 2  | AHRR       | smoking;<br>lung cancer | Cigarette smoking and DNA methylation; Hypomethylation of smoking-related genes is associated with future lung cancer in four prospective cohorts            |
| 3  | ANKRD45    | cancer                  | Ankrd45 Is a Novel Ankyrin Repeat Protein Required for Cell Proliferation                                                                                    |
| 4  | CCDC167    | cancer                  | <a href="https://www.proteinatlas.org/ENSG00000198937-CCDC167/pathology">https://www.proteinatlas.org/ENSG00000198937-CCDC167/pathology</a>                  |
| 5  | CCHCR1     | cancer                  | Centrosomal Localization of the Psoriasis Candidate Gene Product, CCHCR1, Supports a Role in Cytoskeletal Organization                                       |
| 6  | CDK6       | smoking                 | Cigarette tar phenols impede T cell cycle progression by inhibiting cyclin-dependent kinases                                                                 |
| 7  | CHST2      | smoking                 | Differential gene expression patterns between smokers and non-smokers: cause or consequence?                                                                 |
| 8  | CLEC16A    | cancer                  | <a href="https://www.proteinatlas.org/ENSG00000038532-CLEC16A/pathology">https://www.proteinatlas.org/ENSG00000038532-CLEC16A/pathology</a>                  |
| 9  | COL4A2     | cancer                  | siRNA-Mediated suppression of collagen type iv alpha 2 (COL4A2) mRNA inhibits triple-negative breast cancer cell proliferation and migration                 |
| 10 | COL9A1     | smoking                 | Variants in FAT1 and COL9A1 genes in male population with or without substance use to assess the risk factors for oral malignancy                            |
| 11 | COL9A3     | cancer                  | Genomic Dereglulation during Renal Cell Carcinoma Metastasis Implements a Myofibroblast-Like Gene Expression Program                                         |
| 12 | CPOX       | smoking                 | CpG Sites Associated with Cigarette Smoking: Analysis of Epigenome-Wide Data from the Sister Study                                                           |
| 13 | CYP1A1     | cancer                  | Association between cytochrome P450 1A1 (CYP1A1) gene polymorphisms and the risk of renal cell carcinoma: a meta-analysis                                    |
| 14 | CYP1B1     | smoking;<br>lung cancer | Interaction of CYP1B1, cigarette-smoke carcinogen metabolism, and lung cancer risk                                                                           |
| 15 | CYP1B1-AS1 | smoking                 | A combined epigenome- and transcriptome-wide association study of the oral masticatory mucosa assigns CYP1B1 a central role for epithelial health in smokers |

---

|    |            |                         |                                                                                                                                                                                                                                     |
|----|------------|-------------------------|-------------------------------------------------------------------------------------------------------------------------------------------------------------------------------------------------------------------------------------|
| 16 | DNAH10     | smoking                 | FOXJ1 Prevents Cilia Growth Inhibition by Cigarette Smoke in Human Airway Epithelium In Vitro                                                                                                                                       |
| 17 | ECM1       | smoking                 | Identification of novel target genes in human lung tissue involved in chronic obstructive pulmonary disease                                                                                                                         |
| 18 | ELK4       | NSCLC                   | Resection of Non-Small Cell Lung Cancers Reverses Tumor-Induced Gene Expression Changes in the Peripheral Immune System                                                                                                             |
| 19 | ETV6       | smoking;<br>cancer      | Correlates of prenatal and early-life tobacco smoke exposure and frequency of common gene deletions in childhood acute lymphoblastic leukemia; Common genetic variation in ETV6 is associated with colorectal cancer susceptibility |
| 20 | EXOC3      | smoking                 | Smoking induces DNA methylation changes in Multiple Sclerosis patients with exposure-response relationship                                                                                                                          |
| 21 | EXOC3-AS1  | NSCLC                   | LncRNAs are altered in lung squamous cell carcinoma and lung adenocarcinoma                                                                                                                                                         |
| 22 | FAM135B    | lung cancer             | Comprehensive genomic profiling of small cell lung cancer in Chinese patients and the implications for therapeutic potential                                                                                                        |
| 23 | FAM83F     | luad                    | FAM83 family oncogenes are broadly involved in human cancers: an integrative multi-omics approach                                                                                                                                   |
| 24 | FCER2      | lung cancer             | Polymorphisms in innate immunity genes and lung cancer risk in Xuanwei, China                                                                                                                                                       |
| 25 | FCRLA      | smoking                 | Maternal smoking impacts key biological pathways in newborns through epigenetic modification in Utero                                                                                                                               |
| 26 | FGFR2      | smoking;<br>cancer      | FGFR2 intronic SNPs and breast cancer risk: associations with tumor characteristics and interactions with exogenous exposures and other known breast cancer risk factors                                                            |
| 27 | FOXJ3      | lung cancer             | MiR-517a-3p accelerates lung cancer cell proliferation and invasion through inhibiting FOXJ3 expression                                                                                                                             |
| 28 | GPR15      | smoking                 | Novel DNA Methylation Sites Influence GPR15 Expression in Relation to Smoking                                                                                                                                                       |
| 29 | IGF2BP3    | smoking;<br>lung cancer | Effects of Cigarette Smoke on the Human Oral Mucosal Transcriptome; Insulin-like growth factor 2 mRNA binding protein 3 (IGF2BP3) promotes lung tumorigenesis via attenuating p53 stability                                         |
| 30 | IL10RB     | smoking                 | Axonal guidance signaling pathway interacting with smoking in modifying the risk of pancreatic cancer: a gene- and pathway-based interaction analysis of GWAS data                                                                  |
| 31 | IL10RB-AS1 | cancer                  | Benchmark of lncRNA Quantification for RNA-Seq of Cancer Samples                                                                                                                                                                    |
| 32 | IQGAP2     | cancer                  | Reduced expression of IQGAP2 and higher expression of IQGAP3 correlates with poor prognosis in cancers                                                                                                                              |
| 33 | KCNN3      | smoking                 | KCNN Genes that Encode Small-Conductance Ca <sup>2+</sup> -Activated K <sup>+</sup> Channels Influence Alcohol and Drug Addiction                                                                                                   |
| 34 | KIAA1143   | smoking;<br>luad        | Meta-analysis of mRNA expression profiles to identify differentially expressed genes in lung adenocarcinoma tissue from smokers and non-smokers                                                                                     |
| 35 | KIF15      | luad                    | Increased KIF15 Expression Predicts a Poor Prognosis in Patients with Lung Adenocarcinoma                                                                                                                                           |
| 36 | LGR6       | smoking                 | Differential gene expression patterns between smokers and non-smokers: cause or consequence?                                                                                                                                        |
| 37 | LIMK1      | smoking;<br>cancer      | PI3K Catalytic Isoform Alteration Promotes the LIMK1-related Metastasis Through the PAK1 or ROCK1/2 Activation in Cigarette Smoke-exposed Ovarian Cancer Cells                                                                      |
| 38 | LINC00886  | lusc                    | LncRNAs are altered in lung squamous cell carcinoma and lung adenocarcinoma                                                                                                                                                         |
| 39 | LINC01019  | smoking                 | DNA methylation and smoking in Korean adults: epigenome-wide association study                                                                                                                                                      |

---

|    |                    |             |                                                                                                                                                                         |
|----|--------------------|-------------|-------------------------------------------------------------------------------------------------------------------------------------------------------------------------|
| 40 | MEG3               | lung cancer | Association Between Long Noncoding RNA MEG3 Polymorphisms and Lung Cancer Susceptibility in Chinese Northeast Population                                                |
| 41 | MFSD4              | cancer      | Metastatic pathway-specific transcriptome analysis identifies MFSD4 as a putative tumor suppressor and biomarker for hepatic metastasis in patients with gastric cancer |
| 42 | NAV2               | cancer      | Neuron navigator 2 overexpression indicates poor prognosis of colorectal cancer and promotes invasion through the SSH1L/cofilin-1 pathway                               |
| 43 | NTRK2              | smoking     | Gene-gene interactions among CHRNA4, CHRNB2, BDNF and NTRK2 in nicotine dependence                                                                                      |
| 44 | PACSIN2            | smoking     | Gene Expression Signature of Cigarette Smoking and Its Role in Lung Adenocarcinoma Development and Survival                                                             |
| 45 | PARK7              | NSCLC       | Status of the Parkinson's disease gene family expression in non-small-cell lung cancer                                                                                  |
| 46 | PRDM2              | NSCLC       | The methylation profiles of PRDM promoters in non-small cell lung cancer                                                                                                |
| 47 | PRRX1              | cancer      | Aberrant expression of vasculogenic mimicry, PRRX1, and CIP2A in clear cell renal cell carcinoma and its clinicopathological significance                               |
| 48 | PSMA2              | lung cancer | The transcription levels and prognostic values of seven proteasome alpha subunits in human cancers                                                                      |
| 49 | PTPRJ              | lung cancer | The receptor protein tyrosine phosphatase PTPRJ negatively modulates the CD98hc oncoprotein in lung cancer cells                                                        |
| 50 | PTPRN2             | luad        | Frequent silencing of the candidate tumor suppressor TRIM58 by promoter methylation in early-stage lung adenocarcinoma                                                  |
| 51 | PXN                | cancer      | Paxillin promotes colorectal tumor invasion and poor patient outcomes via ERK-mediated stabilization of Bcl-2 protein by phosphorylation at Serine 87                   |
| 52 | RAB11FIP1          | cancer      | RCP is a human breast cancer-promoting gene with Ras-activating function                                                                                                |
| 53 | RASSF5             | cancer      | Frequent promoter hypermethylation of tumor-related genes in head and neck squamous cell carcinoma                                                                      |
| 54 | SASH1              | smoking     | SASH1, a new potential link between smoking and atherosclerosis                                                                                                         |
| 55 | SHISA2             | cancer      | SHISA2 enhances the aggressive phenotype in prostate cancer through the regulation of WNT5A expression                                                                  |
| 56 | SLC1A2             | smoking     | Glutamate and Synaptic Plasticity Systems and Smoking Behavior: Results from a Genetic Association Study                                                                |
| 57 | TBC1D24            | cancer      | Downregulation of TBC1 Domain Family Member 24 (BC1D24) Inhibits Breast Carcinoma Growth via IGF1R/PI3K/AKT Pathway                                                     |
| 58 | TEKT3              | lusc        | Weighted gene co-expression network analysis in identification of metastasis-related genes of lung squamous cell carcinoma based on the Cancer Genome Atlas database    |
| 59 | TMEM110-<br>MUSTN1 | luad        | Identification of Proteomic Features To Distinguish Benign Pulmonary Nodules from Lung Adenocarcinoma                                                                   |
| 60 | ZNF692             | luad        | ZNF692 promotes proliferation and cell mobility in lung adenocarcinoma                                                                                                  |
| 61 | ZNF7               | cancer      | <a href="https://www.proteinatlas.org/ENSG00000147789-ZNF7/pathology">https://www.proteinatlas.org/ENSG00000147789-ZNF7/pathology</a>                                   |

Note: The remaining 34 genes involved in the disease are not yet clear. luad: lung adenocarcinoma; lusc: lung squamous cell carcinoma; NSCLC: Non-small cell lung cancer

**Table S7.** The 33 possible related genes corresponding to proteins whose betweenness greater than or equal to 100 obtained by BIMC method using the shortest path algorithm and PPI network

| hgnc_symbol | Ensembl | Betweenness |
|-------------|---------|-------------|
|-------------|---------|-------------|

---

|    |          |                 |     |
|----|----------|-----------------|-----|
| 1  | MAGOH    | ENSP00000360525 | 289 |
| 2  | FYN      | ENSP00000346671 | 204 |
| 3  | CBL      | ENSP00000264033 | 162 |
| 4  | RHOA     | ENSP00000400175 | 158 |
| 5  | MAPK8    | ENSP00000353483 | 157 |
| 6  | CYC1     | ENSP00000317159 | 152 |
| 7  | ITGB1    | ENSP00000303351 | 150 |
| 8  | CCL26    | ENSP00000005180 | 149 |
| 9  | CYCS     | ENSP00000307786 | 149 |
| 10 | DHX8     | ENSP00000262415 | 148 |
| 11 | CCR1     | ENSP00000296140 | 148 |
| 12 | CDC40    | ENSP00000304370 | 148 |
| 13 | PRPF18   | ENSP00000367835 | 148 |
| 14 | CCR5     | ENSP00000292303 | 144 |
| 15 | WDR5     | ENSP00000351446 | 143 |
| 16 | CXCR4    | ENSP00000386884 | 142 |
| 17 | CFTR     | ENSP00000003084 | 142 |
| 18 | GSTP1    | ENSP00000381607 | 140 |
| 19 | MT-ATP6  | ENSP00000354632 | 139 |
| 20 | MT-CO3   | ENSP00000354982 | 139 |
| 21 | ATP5F1A  | ENSP00000282050 | 139 |
| 22 | OGT      | ENSP00000362824 | 138 |
| 23 | HCFC1    | ENSP00000309555 | 138 |
| 24 | PPP1CB   | ENSP00000296122 | 138 |
| 25 | ITGA4    | ENSP00000380227 | 124 |
| 26 | PXN      | ENSP00000228307 | 123 |
| 27 | SDC2     | ENSP00000307046 | 118 |
| 28 | FGF2     | ENSP00000264498 | 116 |
| 29 | FGFR1    | ENSP00000393312 | 116 |
| 30 | SERPINC1 | ENSP00000356671 | 113 |
| 31 | KCTD10   | ENSP00000228495 | 106 |
| 32 | ATXN3    | ENSP00000376965 | 106 |
| 33 | RPS3     | ENSP00000433821 | 100 |

---

## Supplementary References

Abdi, H. and Williams, L.J. Partial least squares methods: partial least squares correlation and partial least square regression. *Methods Mol Biol* 2013;930:549-579.

Nguyen, D.V. and Rocke, D.M. Tumor classification by partial least squares using microarray gene expression data. *Bioinformatics* 2002;18(1):39-50.

Qiu, Z.W., *et al.* Genome-wide copy number variation pattern analysis and a classification signature for non-small cell lung cancer. *Genes Chromosomes Cancer* 2017;56(7):559-569.

Song, K., *et al.* Classifier assessment and feature selection for recognizing short coding sequences of human genes. *J Comput Biol* 2012;19(3):251-260.

Yuan, L., *et al.* Integration of Multi-omics Data for Gene Regulatory Network Inference and Application to Breast Cancer. *IEEE/ACM Trans Comput Biol Bioinform* 2018.
